# Supplementary material for: IL-12 stimulates CTLs to secrete exosomes capable of activating bystander CD8+ T cells
Source: PubMed Central journal article supplement (PMC5645350; doi:10.1038/s41598-017-14000-z), 2017-10-17
Supplement: 41598_2017_14000_MOESM1_ESM.pdf [file 41598_2017_14000_MOESM1_ESM.pdf]

# IL-12 stimulates CTLs to secrete exosomes capable of activating bystander CD8<sup>+</sup> T cells

Lei Li<sup>1</sup>, Steven M. Jay<sup>2</sup>, Yan Wang<sup>3</sup>, Shu-Wei Wu<sup>1</sup> and Zhengguo Xiao<sup>1</sup>

<sup>1</sup>Department of Animal and Avian Sciences, University of Maryland, College Park, Maryland 20742, USA;

<sup>2</sup>Fischell Department of Bioengineering, University of Maryland, College Park, Maryland 20742, USA;

<sup>3</sup>Department of Cell Biology and Molecular Genetics, University of Maryland, College Park, Maryland 20742, USA;

**Corresponding Author:** Zhengguo Xiao, Ph.D.  
Department of Animal and Avian Sciences  
University of Maryland  
College Park, MD 20742 USA  
Phone: 301-405-6258  
FAX: 301-405-7980  
Email: [xiao0028@umd.edu](mailto:xiao0028@umd.edu)

## Index for supplementary information

| Information                                                                                           | Pages |
|-------------------------------------------------------------------------------------------------------|-------|
| Suppl.Fig.1 Comparison of GAPDP expression                                                            | 1     |
| Suppl.Fig.2 Memory CTL programming is not affected by exosomes.                                       | 1     |
| Suppl.Fig.3 Uncropped images of the blots for Fig.2a                                                  | 2     |
| Suppl.Fig.4 Response of naïve CD8 <sup>+</sup> T cells to cytokines                                   | 3     |
| Suppl.Fig.5 Effects of exosome inhibition on CD8 <sup>+</sup> T cells under low antigen concentration | 3     |
| Suppl.table.1 Proteins Detected in Exosomes                                                           | 4-43  |
| Suppl.table.2 PANTHER Analysis of Exosomal Proteins                                                   | 44-45 |
| Suppl.table.3 Unique Proteins Induced by IL-12                                                        | 46-47 |
| Suppl.table.4 Molecular and Cellular Functions of IL-12-induced Unique Proteins                       | 48    |

## Supplementary information

### Manuscript: IL-12 stimulates CTLs to secrete exosomes capable of activating bystander CD8<sup>+</sup> T cells

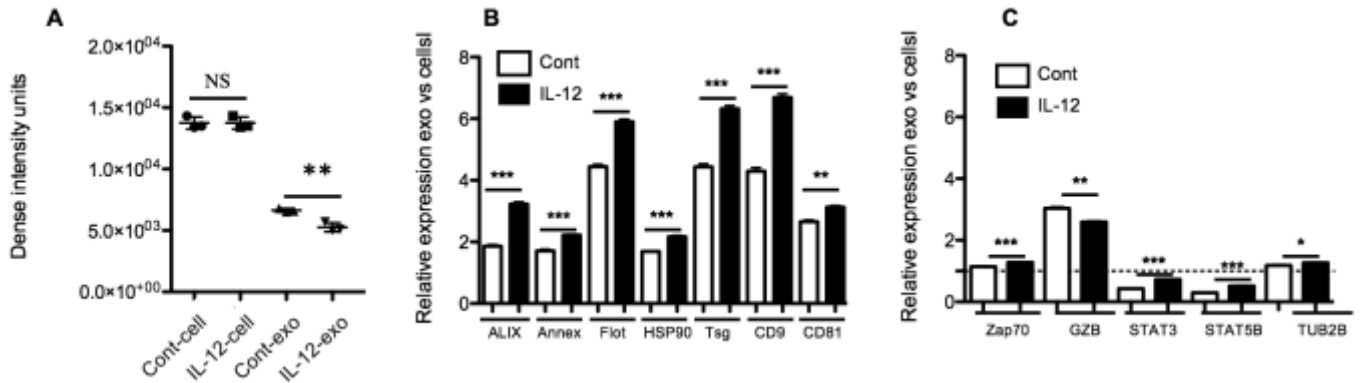

Supplementary Fig.1. Equal amount of protein (10  $\mu$ g) from either cell lysate or exosomes was examined in western blot. A. GAPDH was quantified based on blot intensity. B-C. Reanalysis of the same data as in Fig.2 B-C, adjusted by the difference of the mean value of GAPDH between cont-exo and IL-12-exo, so the protein level in cont-exo was increased by about 30%, whereas protein level in IL-12-exo was kept as unchanged.

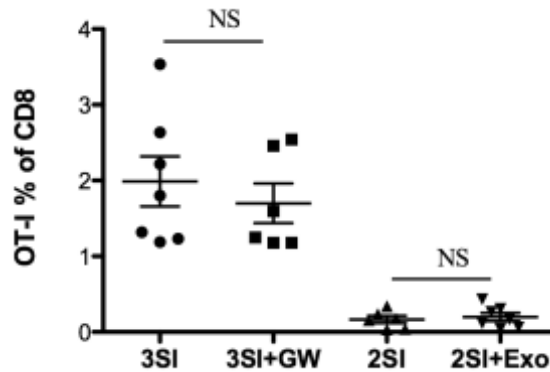

Supplementary Fig.2. Naïve OT-I cells were cultured with either 3SI (including IL-12) or 2SI for three days. GM: GW4869, at 2  $\mu$ M at the beginning of stimulation. Exo: IL-12-conditioned exosomes, at 33  $\mu$ g/ml of protein concentration, added at the beginning of stimulation. CTLs were washed extensively, and were transferred into naïve B6 mice at  $2 \times 10^5$ /mouse through i.v. Blood samples was drawn at day 15 after transfer to detect the presence of OT-I cells.

Supplementary Figure 3. Uncropped images of the blots for Fig.2a

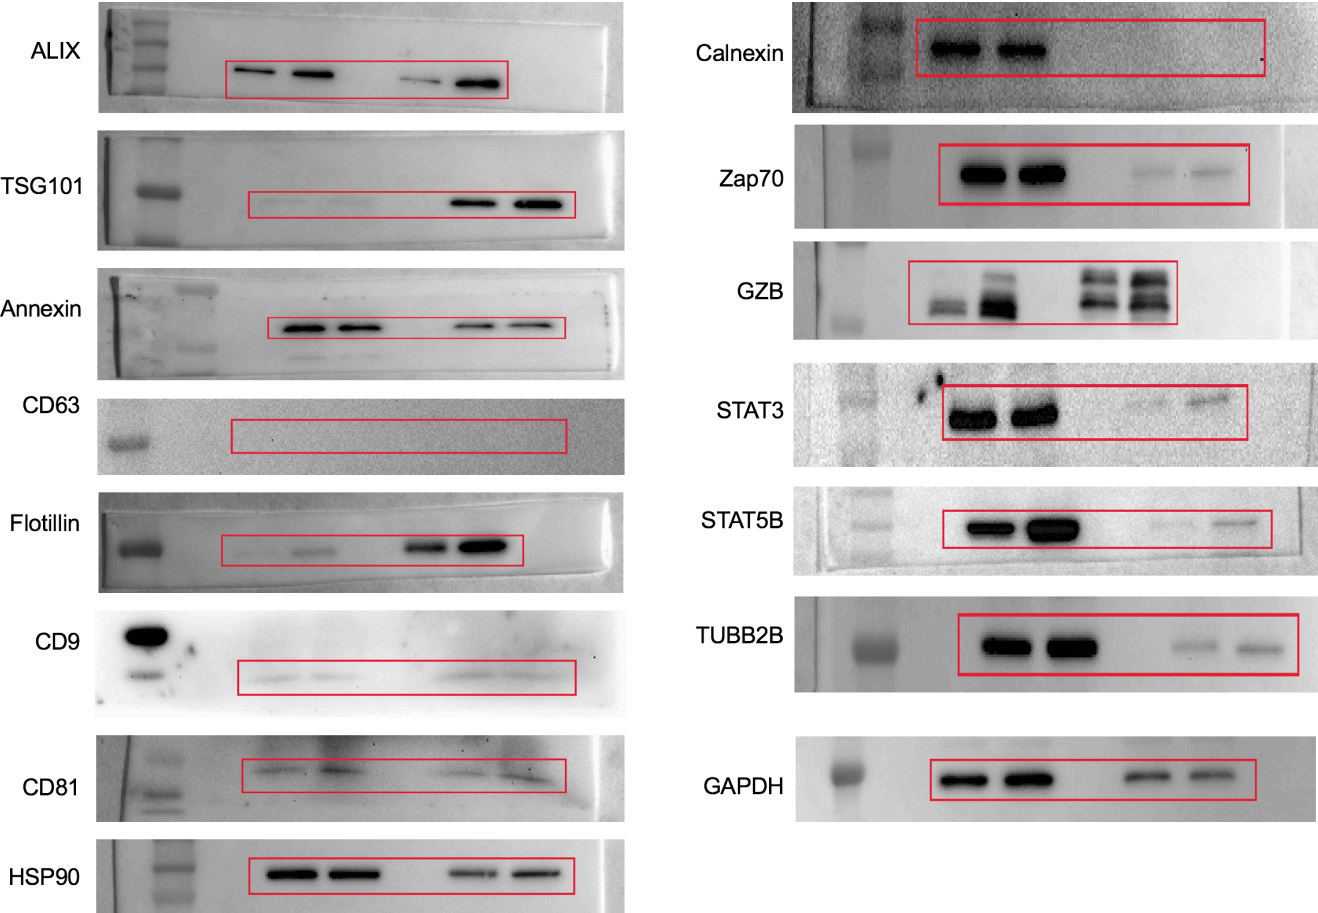

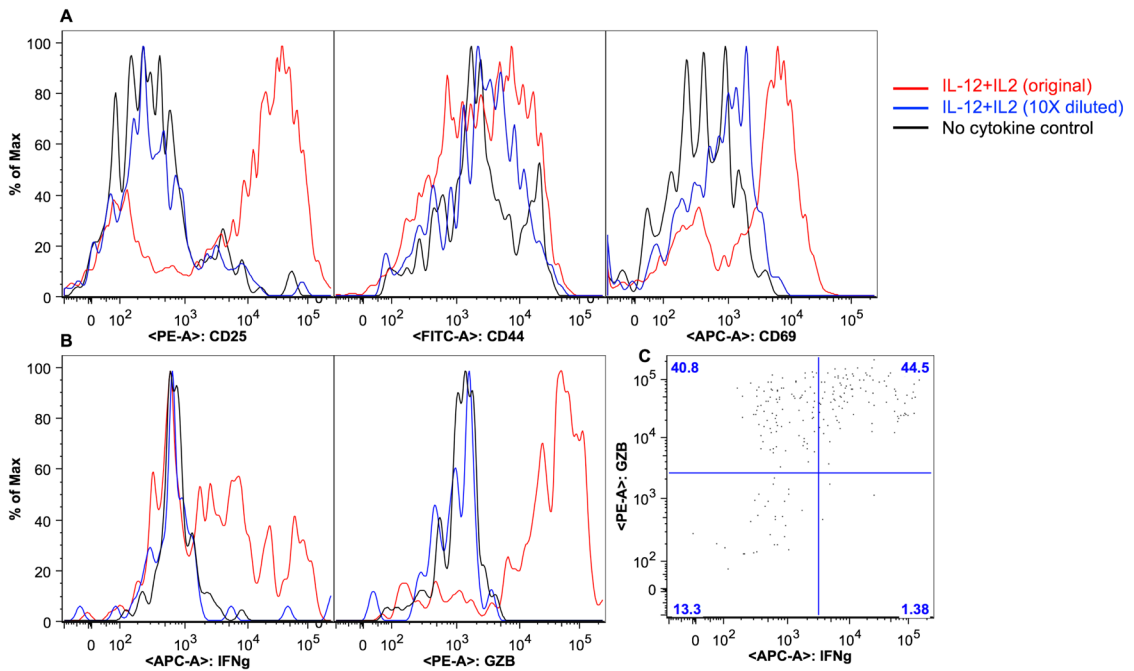

Supplementary Fig.4. Naïve CD8<sup>+</sup> T cells purified from B6 were cultured with IL-2 and/or IL12 for three days. Viable cells were analyzed for expression of CD25, CD44 and CD69 (A), and IFN $\gamma$ /GZB (B). C. A representative dot plot from IL-12/IL2 conditioned CD8<sup>+</sup> T cells. This shows all the detected cells (about 300) from the initial input about 0.5X10<sup>5</sup> naïve CD8<sup>+</sup> T cells. The experiment was performed twice on naïve CD8<sup>+</sup> T cells from both B6 and OT-I mice, with similar results.

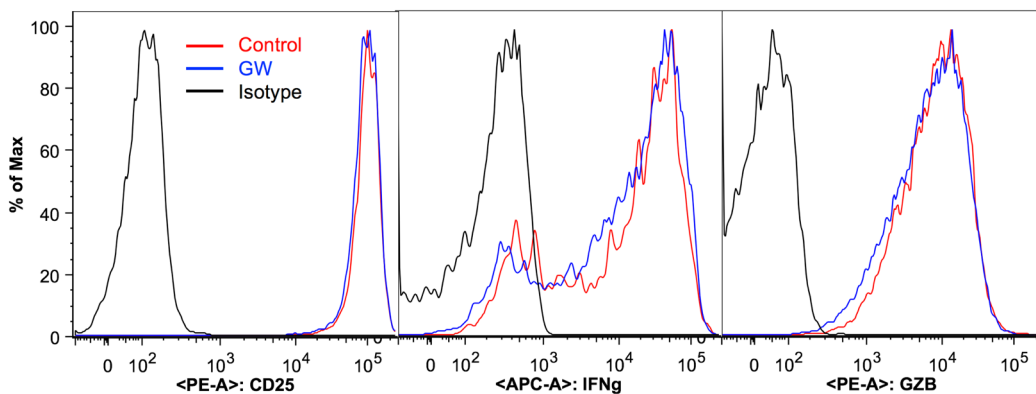

Supplementary Fig.5. Naïve OT-I CD8<sup>+</sup> cells were cultured for three days with 3SI (including IL-12), but with antigen diluted at 1000X based on the standard concentration used in Fig.5, in the presence (GW) or absence (Control) of GW. The experiment was tested twice with similar results.

## Supplementary table-1 Proteins Detected in Exosomes

| ID           | Protein name                               | 2SI | 3SI | Numbers indi |
|--------------|--------------------------------------------|-----|-----|--------------|
| 702 P60710   | Actin, cytoplasmic 1 OS=Mus musculus C     |     | 437 | 424          |
| 1477 Q4KL81  | Actin, cytoplasmic 2 OS=Mus musculus C     |     | 427 | 416          |
| 574 P26041   | Moesin OS=Mus musculus GN=Msn PE=          |     | 229 | 186          |
| 573 P26039   | Talin-1 OS=Mus musculus GN=Tln1 PE=        |     | 156 | 134          |
| 777 P68134   | Actin, alpha skeletal muscle OS=Mus mu:    |     | 146 | 148          |
| 474 P06800   | Receptor-type tyrosine-protein phosphatase |     | 146 | 120          |
| 2563 S4R1M0  | Receptor-type tyrosine-protein phosphatase |     | 146 | 120          |
| 2564 S4R1S4  | Receptor-type tyrosine-protein phosphatase |     | 146 | 120          |
| 2566 S4R2V1  | Protein tyrosine phosphatase, receptor typ |     | 146 | 120          |
| 760 P63017   | Heat shock cognate 71 kDa protein OS=M     |     | 128 | 103          |
| 549 P18760   | Cofilin-1 OS=Mus musculus GN=Cfl1 PE       |     | 112 | 96           |
| 1018 Q3TJX0  | Putative uncharacterized protein OS=Mus    |     | 111 | 103          |
| 1663 Q61233  | Plastin-2 OS=Mus musculus GN=Lcp1 PI       |     | 111 | 103          |
| 1478 Q4KML7  | Ezrin OS=Mus musculus GN=Ezr PE=1 S        |     | 111 | 84           |
| 240 E9Q5G3   | Kinesin-like protein KIF23 OS=Mus musc     |     | 109 | 76           |
| 2155 Q8VDN2  | Sodium/potassium-transporting ATPase si    |     | 108 | 90           |
| 2457 Q9JKF1  | Ras GTPase-activating-like protein IQGA    |     | 107 | 117          |
| 575 P26043   | Radixin OS=Mus musculus GN=Rdx PE=         |     | 104 | 84           |
| 128 B7FAU9   | Filamin, alpha OS=Mus musculus GN=Fl       |     | 99  | 88           |
| 1971 Q8BTM8  | Filamin-A OS=Mus musculus GN=Flna P        |     | 99  | 88           |
| 823 P99024   | Tubulin beta-5 chain OS=Mus musculus C     |     | 98  | 87           |
| 1371 Q3ULT2  | Actinin alpha 4 OS=Mus musculus GN=A       |     | 97  | 98           |
| 502 P11499   | Heat shock protein HSP 90-beta OS=Mus      |     | 94  | 93           |
| 2152 Q8VDD5  | Myosin-9 OS=Mus musculus GN=Myh9 ]         |     | 91  | 73           |
| 534 P16858   | Glyceraldehyde-3-phosphate dehydrogena     |     | 86  | 83           |
| 780 P68372   | Tubulin beta-4B chain OS=Mus musculus      |     | 86  | 74           |
| 1292 Q3UDK4  | Annexin OS=Mus musculus GN=Anxa6 I         |     | 84  | 77           |
| 697 P58252   | Elongation factor 2 OS=Mus musculus Gl     |     | 83  | 85           |
| 1605 Q5SUA5  | Unconventional myosin-Ig OS=Mus musc       |     | 83  | 83           |
| 312 F8WIT2   | Annexin OS=Mus musculus GN=Anxa6 I         |     | 83  | 76           |
| 1616 Q5SXR6  | Clathrin heavy chain OS=Mus musculus C     |     | 82  | 98           |
| 1723 Q68FD5  | Clathrin heavy chain 1 OS=Mus musculus     |     | 82  | 98           |
| 1696 Q62351  | Transferrin receptor protein 1 OS=Mus m    |     | 82  | 79           |
| 1897 Q8BFZ3  | Beta-actin-like protein 2 OS=Mus muscul    |     | 80  | 82           |
| 679 P52480   | Pyruvate kinase PKM OS=Mus musculus        |     | 79  | 84           |
| 666 P49025-5 | Isoform 5 of Citron Rho-interacting kinas  |     | 78  | 34           |
| 504 P11835   | Integrin beta-2 OS=Mus musculus GN=Iti     |     | 75  | 60           |

|      |        |                                             |    |    |
|------|--------|---------------------------------------------|----|----|
| 138  | B7ZN90 | Itgal protein OS=Mus musculus GN=Itgal      | 73 | 58 |
| 242  | E9Q5M7 | Integrin alpha-L OS=Mus musculus GN=]       | 73 | 58 |
| 276  | E9QNL8 | Integrin alpha-L OS=Mus musculus GN=]       | 73 | 58 |
| 351  | H2ELL3 | Alpha L integrin (Fragment) OS=Mus mu       | 73 | 58 |
| 885  | Q3T9N8 | Putative uncharacterized protein OS=Mus     | 73 | 58 |
| 903  | Q3TB85 | Putative uncharacterized protein OS=Mus     | 73 | 58 |
| 1140 | Q3U159 | Itgal protein OS=Mus musculus GN=Itgal      | 73 | 58 |
| 2482 | Q9QYB1 | Chloride intracellular channel protein 4 O  | 72 | 56 |
| 271  | E9QM99 | Dedicator of cytokinesis protein 10 OS=M    | 67 | 62 |
| 1322 | Q3UH60 | Disco-interacting protein 2 homolog B OS    | 66 | 46 |
| 468  | P05213 | Tubulin alpha-1B chain OS=Mus muscul        | 65 | 57 |
| 1568 | Q5FWB7 | Fructose-bisphosphate aldolase OS=Mus 1     | 64 | 70 |
| 779  | P68369 | Tubulin alpha-1A chain OS=Mus muscul        | 64 | 55 |
| 550  | P19096 | Fatty acid synthase OS=Mus musculus G       | 64 | 52 |
| 2533 | Q9WVK4 | EH domain-containing protein 1 OS=Mus       | 63 | 72 |
| 1879 | Q80Y52 | Heat shock protein 90, alpha (Cytosolic),   | 63 | 66 |
| 126  | B2RY84 | Kinesin-like protein OS=Mus musculus G      | 61 | 42 |
| 376  | L0N7N1 | Kinesin-like protein KIF14 OS=Mus musc      | 61 | 42 |
| 1840 | Q7TPR4 | Alpha-actinin-1 OS=Mus musculus GN=/        | 59 | 48 |
| 778  | P68368 | Tubulin alpha-4A chain OS=Mus muscul        | 57 | 49 |
| 486  | P09411 | Phosphoglycerate kinase 1 OS=Mus musc       | 56 | 59 |
| 1878 | Q80Y09 | Pdcd6ip protein OS=Mus musculus GN=I        | 56 | 48 |
| 2521 | Q9WU78 | Programmed cell death 6-interacting prote   | 56 | 48 |
| 482  | P08752 | Guanine nucleotide-binding protein G(i) s   | 54 | 48 |
| 1714 | Q64478 | Histone H2B type 1-H OS=Mus musculus        | 54 | 43 |
| 2238 | Q99JI6 | Ras-related protein Rap-1b OS=Mus musc      | 53 | 44 |
| 1390 | Q3UP78 | T-cell surface glycoprotein CD5 OS=Mus      | 50 | 48 |
| 2189 | Q91X69 | CD5 antigen OS=Mus musculus GN=Cd5          | 50 | 48 |
| 471  | P06240 | Proto-oncogene tyrosine-protein kinase L    | 50 | 43 |
| 2552 | Q9Z1Q5 | Chloride intracellular channel protein 1 O  | 49 | 57 |
| 439  | O88342 | WD repeat-containing protein 1 OS=Mus       | 49 | 52 |
| 791  | P70441 | Na(+)/H(+) exchange regulatory cofactor     | 49 | 46 |
| 2534 | Q9WVM1 | Rac GTPase-activating protein 1 OS=Mus      | 49 | 37 |
| 1548 | Q58E70 | Tpm3 protein OS=Mus musculus GN=Tpm         | 48 | 55 |
| 1311 | Q3UFR4 | Amino acid transporter OS=Mus muscul        | 47 | 41 |
| 2433 | Q9ESU7 | Amino acid transporter OS=Mus muscul        | 47 | 41 |
| 951  | Q3TH01 | H-2 class I histocompatibility antigen, K-I | 46 | 46 |
| 2570 | W5XHY0 | MHC class I antigen OS=Mus musculus C       | 46 | 46 |
| 500  | P11276 | Fibronectin OS=Mus musculus GN=Fn1 I        | 46 | 34 |
| 1320 | Q3UGY5 | Putative uncharacterized protein OS=Mus     | 46 | 34 |

|      |          |                                             |    |    |
|------|----------|---------------------------------------------|----|----|
| 495  | P10852-2 | Isoform 2 of 4F2 cell-surface antigen heav  | 45 | 48 |
| 831  | Q01853   | Transitional endoplasmic reticulum ATPa     | 44 | 50 |
| 743  | P62835   | Ras-related protein Rap-1A OS=Mus mus       | 43 | 39 |
| 505  | P11983   | T-complex protein 1 subunit alpha OS=M      | 43 | 35 |
| 1067 | Q3TQ70   | Beta1 subunit of GTP-binding protein OS=    | 42 | 40 |
| 768  | P63101   | 14-3-3 protein zeta/delta OS=Mus muscul     | 42 | 34 |
| 538  | P17742   | Peptidyl-prolyl cis-trans isomerase A OS=   | 41 | 49 |
| 922  | Q3TE63   | Peptidyl-prolyl cis-trans isomerase OS=M    | 41 | 49 |
| 1734 | Q6A0F1   | MKIAA0002 protein (Fragment) OS=Mus         | 41 | 41 |
| 630  | P40124   | Adenylyl cyclase-associated protein 1 OS=   | 41 | 36 |
| 424  | O55098   | Serine/threonine-protein kinase 10 OS=M     | 41 | 20 |
| 1011 | Q3TJH1   | Putative uncharacterized protein OS=Mus     | 40 | 40 |
| 2405 | Q9DC51   | Guanine nucleotide-binding protein G(k) :   | 40 | 40 |
| 1509 | Q542X7   | Chaperonin subunit 2 (Beta), isoform CR/    | 40 | 38 |
| 461  | P01899   | H-2 class I histocompatibility antigen, D-I | 39 | 37 |
| 528  | P15702   | Leukosialin OS=Mus musculus GN=Spn l        | 39 | 37 |
| 1745 | Q6KAS9   | MFLJ00087 protein (Fragment) OS=Mus         | 38 | 36 |
| 1438 | Q3UZQ3   | Elongation factor 1-alpha OS=Mus muscu      | 38 | 34 |
| 798  | P80315   | T-complex protein 1 subunit delta OS=Mt     | 38 | 33 |
| 987  | Q3TII0   | T-complex protein 1 subunit delta OS=Mt     | 38 | 33 |
| 1603 | Q5SS40   | 14-3-3 protein epsilon OS=Mus musculus      | 38 | 30 |
| 2086 | Q8CGC7   | Bifunctional glutamate/proline--tRNA lig    | 38 | 27 |
| 2515 | Q9WTI7   | Unconventional myosin-Ic OS=Mus musc        | 38 | 22 |
| 1128 | Q3TZH4   | Granzyme B OS=Mus musculus GN=Gzn           | 37 | 54 |
| 1144 | Q3U1N0   | Coronin OS=Mus musculus GN=Coro1a l         | 37 | 41 |
| 1148 | Q3U232   | Coronin OS=Mus musculus GN=Coro1a l         | 37 | 41 |
| 470  | P06151   | L-lactate dehydrogenase A chain OS=Mus      | 37 | 36 |
| 2091 | Q8CGP5   | Histone H2A type 1-F OS=Mus musculus        | 37 | 35 |
| 950  | Q3TGW0   | Putative uncharacterized protein OS=Mus     | 37 | 34 |
| 799  | P80316   | T-complex protein 1 subunit epsilon OS=l    | 37 | 33 |
| 2047 | Q8C605   | ATP-dependent 6-phosphofructokinase O:      | 37 | 32 |
| 2522 | Q9WUA3   | ATP-dependent 6-phosphofructokinase, p      | 37 | 32 |
| 554  | P20029   | 78 kDa glucose-regulated protein OS=MU      | 36 | 37 |
| 1232 | Q3U9G2   | Putative uncharacterized protein OS=Mus     | 36 | 37 |
| 1651 | Q61003   | T-cell differentiation antigen CD6 OS=Mt    | 36 | 29 |
| 2184 | Q91WN5   | CD6 antigen OS=Mus musculus GN=Cd6          | 36 | 29 |
| 391  | O08992   | Syntenin-1 OS=Mus musculus GN=Sdcbp         | 36 | 28 |
| 443  | O88601   | Syntenin OS=Mus musculus GN=Sdcbp F         | 36 | 28 |
| 928  | Q3TET7   | Putative uncharacterized protein OS=Mus     | 36 | 28 |
| 1052 | Q3TMX0   | MCG4375, isoform CRA_b OS=Mus mus           | 36 | 28 |

|      |        |                                              |    |    |
|------|--------|----------------------------------------------|----|----|
| 1225 | Q3U902 | Putative uncharacterized protein OS=Mus      | 36 | 28 |
| 1264 | Q3UBE4 | Putative uncharacterized protein OS=Mus      | 36 | 28 |
| 1274 | Q3UC68 | Putative uncharacterized protein OS=Mus      | 36 | 28 |
| 750  | P62880 | Guanine nucleotide-binding protein G(I)/C    | 35 | 34 |
| 149  | B9EHN0 | Ubiquitin-activating enzyme E1, Chr X O      | 34 | 39 |
| 1683 | Q61790 | Lymphocyte activation gene 3 protein OS=     | 34 | 35 |
| 1150 | Q3U2G2 | Heat shock 70 kDa protein 4 OS=Mus mu        | 34 | 33 |
| 1544 | Q571M2 | MKIAA4025 protein (Fragment) OS=Mus          | 34 | 33 |
| 872  | Q1MWP9 | EH-domain containing 4 (Fragment) OS=        | 34 | 32 |
| 1043 | Q3TM70 | EH domain-containing protein 4 OS=Mus        | 34 | 32 |
| 116  | B2RUE8 | Map4k4 protein OS=Mus musculus GN=I          | 34 | 26 |
| 2342 | Q9CZ17 | Annexin OS=Mus musculus GN=Anxa2 I           | 33 | 30 |
| 2531 | Q9WVA4 | Transgelin-2 OS=Mus musculus GN=Tag          | 32 | 32 |
| 1669 | Q61598 | Rab GDP dissociation inhibitor beta OS=I     | 32 | 29 |
| 782  | P70168 | Importin subunit beta-1 OS=Mus musculu       | 32 | 26 |
| 938  | Q3TFE8 | Putative uncharacterized protein OS=Mus      | 32 | 26 |
| 1851 | Q7TSZ6 | Karyopherin (Importin) beta 1 OS=Mus n       | 32 | 26 |
| 605  | P32037 | Solute carrier family 2, facilitated glucose | 32 | 23 |
| 1462 | Q4FJP8 | Slc2a3 protein OS=Mus musculus GN=Sl         | 32 | 23 |
| 1938 | Q8BLF7 | Putative uncharacterized protein OS=Mus      | 32 | 23 |
| 314  | F8WIX8 | Histone H2A OS=Mus musculus GN=His           | 31 | 31 |
| 40   | A2APM2 | CD44 antigen OS=Mus musculus GN=Cd           | 31 | 29 |
| 526  | P15379 | CD44 antigen OS=Mus musculus GN=Cd           | 31 | 29 |
| 2107 | Q8K1B8 | Fermitin family homolog 3 OS=Mus musc        | 31 | 26 |
| 119  | B2RUR3 | ATP-binding cassette, sub-family B (MDI      | 31 | 25 |
| 585  | P27659 | 60S ribosomal protein L3 OS=Mus muscu        | 31 | 24 |
| 1258 | Q3UB15 | Putative uncharacterized protein OS=Mus      | 31 | 24 |
| 1260 | Q3UB90 | Putative uncharacterized protein OS=Mus      | 31 | 24 |
| 153  | B9EKE9 | Ddx3x protein OS=Mus musculus GN=Dc          | 31 | 23 |
| 1068 | Q3TQX5 | ATP-dependent RNA helicase DDX3X O           | 31 | 23 |
| 2303 | Q9CVB6 | Actin-related protein 2/3 complex subunit    | 31 | 20 |
| 425  | O55107 | Basigin (Fragment) OS=Mus musculus G         | 30 | 27 |
| 963  | Q3THH8 | Putative uncharacterized protein OS=Mus      | 30 | 22 |
| 704  | P60843 | Eukaryotic initiation factor 4A-I OS=Mus     | 29 | 27 |
| 1475 | Q4FZL1 | Eif4a1 protein (Fragment) OS=Mus musc        | 29 | 27 |
| 1166 | Q3U4U6 | T-complex protein 1 subunit gamma OS=        | 29 | 26 |
| 906  | Q3TCE7 | D-3-phosphoglycerate dehydrogenase OS=       | 29 | 25 |
| 1681 | Q61753 | Putative uncharacterized protein OS=Mus      | 29 | 25 |
| 2202 | Q91Z25 | Actin-related protein 2/3 complex subunit    | 29 | 25 |
| 2528 | Q9WV32 | Actin-related protein 2/3 complex subunit    | 29 | 25 |



|      |          |                                              |    |    |
|------|----------|----------------------------------------------|----|----|
| 1589 | Q5PPQ7   | Coronin OS=Mus musculus GN=Coro1c 1          | 28 | 25 |
| 1719 | Q64737   | Trifunctional purine biosynthetic protein ε  | 28 | 25 |
| 2523 | Q9WUM4   | Coronin-1C OS=Mus musculus GN=Coro           | 28 | 25 |
| 755  | P62962   | Profilin-1 OS=Mus musculus GN=Pfn1 P         | 28 | 24 |
| 458  | P01831   | Thy-1 membrane glycoprotein OS=Mus n         | 28 | 23 |
| 1498 | Q53YX2   | CD90.1 OS=Mus musculus GN=Thy1 PE            | 28 | 23 |
| 1697 | Q62418   | Drebrin-like protein OS=Mus musculus G       | 28 | 23 |
| 539  | P17751   | Triosephosphate isomerase OS=Mus musc        | 27 | 32 |
| 532  | P16546   | Spectrin alpha chain, non-erythrocytic 1 C   | 27 | 14 |
| 724  | P62137   | Serine/threonine-protein phosphatase PP1     | 26 | 26 |
| 110  | B2RQC6   | CAD protein OS=Mus musculus GN=Cad           | 26 | 25 |
| 257  | E9QAI5   | CAD protein OS=Mus musculus GN=Cad           | 26 | 25 |
| 811  | P97370   | Sodium/potassium-transporting ATPase si      | 26 | 22 |
| 473  | P06745   | Glucose-6-phosphate isomerase OS=Mus         | 26 | 19 |
| 228  | E9Q3L2   | Protein Pi4ka OS=Mus musculus GN=Pi4         | 26 | 11 |
| 1739 | Q6DIC7   | Phosphatidylinositol 4-kinase, catalytic, al | 26 | 11 |
| 1595 | Q5RKN9   | Capping protein (Actin filament) muscle 2    | 25 | 23 |
| 1534 | Q564E8   | 60S ribosomal protein L4 OS=Mus muscu        | 25 | 21 |
| 1752 | Q6NZB6   | Ly9 protein (Fragment) OS=Mus musculu        | 25 | 21 |
| 597  | P29351   | Tyrosine-protein phosphatase non-recepto     | 25 | 19 |
| 1276 | Q3UCJ0   | Tyrosine-protein phosphatase non-recepto     | 25 | 19 |
| 1602 | Q5SQX6   | Cytoplasmic FMR1-interacting protein 2 C     | 25 | 19 |
| 509  | P12970   | 60S ribosomal protein L7a OS=Mus musc        | 25 | 16 |
| 1562 | Q5EBG5   | Ribosomal protein L7A OS=Mus musculu         | 25 | 16 |
| 1756 | Q6P1A9   | Ribosomal protein L7A OS=Mus musculu         | 25 | 16 |
| 1867 | Q80UT7   | Rpl7a protein (Fragment) OS=Mus muscu        | 25 | 16 |
| 1486 | Q4VAE6   | Ras family member A OS=Mus musculus          | 24 | 23 |
| 646  | P43404   | Tyrosine-protein kinase ZAP-70 OS=Mus        | 24 | 22 |
| 1531 | Q549Q4   | CD2 antigen OS=Mus musculus GN=Cd2           | 24 | 22 |
| 781  | P68510   | 14-3-3 protein eta OS=Mus musculus GN:       | 24 | 20 |
| 863  | Q149Z9   | Histone H1.3 OS=Mus musculus GN=His          | 24 | 14 |
| 754  | P62960   | Nuclease-sensitive element-binding protei    | 23 | 32 |
| 2397 | Q9DBJ1   | Phosphoglycerate mutase 1 OS=Mus musc        | 23 | 26 |
| 765  | P63087-2 | Isoform Gamma-2 of Serine/threonine-prc      | 23 | 23 |
| 1202 | Q3U7K1   | Serine/threonine-protein phosphatase OS=     | 23 | 23 |
| 1800 | Q6ZWM8   | Serine/threonine-protein phosphatase OS=     | 23 | 23 |
| 2110 | Q8K1X4   | NCK associated protein 1 like OS=Mus m       | 23 | 19 |
| 583  | P27601   | Guanine nucleotide-binding protein subun     | 23 | 16 |
| 596  | P29341   | Polyadenylate-binding protein 1 OS=Mus       | 23 | 15 |
| 1222 | Q3U8U8   | Polyadenylate-binding protein OS=Mus n       | 23 | 15 |

|      |          |                                             |    |    |
|------|----------|---------------------------------------------|----|----|
| 2413 | Q9DCL9   | Multifunctional protein ADE2 OS=Mus n       | 23 | 14 |
| 2404 | Q9DC42   | Uncharacterized protein OS=Mus muscul       | 23 | 11 |
| 2480 | Q9QXY6   | EH domain-containing protein 3 OS=Mus       | 22 | 24 |
| 680  | P53986   | Monocarboxylate transporter 1 OS=Mus r      | 22 | 23 |
| 1073 | Q3TRK9   | Putative uncharacterized protein OS=Mus     | 22 | 23 |
| 1955 | Q8BPS5   | Putative uncharacterized protein OS=Mus     | 22 | 23 |
| 2023 | Q8C2E6   | Putative uncharacterized protein OS=Mus     | 22 | 23 |
| 1247 | Q3UAD6   | Endoplasmin OS=Mus musculus GN=Hsq          | 22 | 22 |
| 1271 | Q3UBU0   | Putative uncharacterized protein OS=Mus     | 22 | 22 |
| 1627 | Q60605-2 | Isoform Smooth muscle of Myosin light p     | 22 | 22 |
| 1789 | Q6PHN9   | Ras-related protein Rab-35 OS=Mus musc      | 22 | 22 |
| 2171 | Q91V38   | Heat shock protein 90, beta (Grp94), mem    | 22 | 22 |
| 2462 | Q9JL26   | Formin-like protein 1 OS=Mus musculus '     | 22 | 22 |
| 73   | A8IP69   | 14-3-3 protein gamma OS=Mus musculus        | 22 | 21 |
| 1458 | Q497E9   | 40S ribosomal protein S8 OS=Mus muscu       | 22 | 21 |
| 1499 | Q540M6   | Tumor necrosis factor receptor superfamil   | 22 | 17 |
| 1615 | Q5SXG3   | Misshapen-like kinase 1 OS=Mus muscul       | 22 | 17 |
| 2042 | Q8C4K3   | Putative uncharacterized protein OS=Mus     | 22 | 17 |
| 2306 | Q9CWJ9   | Bifunctional purine biosynthesis protein P  | 22 | 17 |
| 767  | P63094-2 | Isoform Gnas-2 of Guanine nucleotide-bir    | 22 | 16 |
| 657  | P47911   | 60S ribosomal protein L6 OS=Mus muscu       | 22 | 15 |
| 1617 | Q5SZA3   | Histone H1.2 OS=Mus musculus GN=His         | 22 | 15 |
| 1814 | Q76MZ3   | Serine/threonine-protein phosphatase 2A (   | 22 | 14 |
| 1964 | Q8BT07   | Centrosomal protein of 55 kDa OS=Mus r      | 22 | 14 |
| 2022 | Q8C2E1   | Putative uncharacterized protein OS=Mus     | 22 | 14 |
| 108  | B2RQ80   | Tnik protein OS=Mus musculus GN=Tnik        | 22 | 13 |
| 155  | B9EKN8   | TRAF2 and NCK interacting kinase OS=M       | 22 | 13 |
| 1530 | Q548T0   | Syntaxin binding protein 2, isoform CRA_    | 22 | 10 |
| 896  | Q3TAI8   | Putative uncharacterized protein OS=Mus     | 21 | 25 |
| 1675 | Q61696   | Heat shock 70 kDa protein 1A OS=Mus n       | 21 | 25 |
| 1819 | Q790I0   | Valine--tRNA ligase OS=Mus musculus C       | 21 | 24 |
| 1861 | Q80UE5   | Epb4.112 protein OS=Mus musculus GN=        | 21 | 23 |
| 629  | P39688-2 | Isoform 2 of Tyrosine-protein kinase Fyn    | 21 | 20 |
| 2386 | Q9D8N0   | Elongation factor 1-gamma OS=Mus mus        | 21 | 20 |
| 1557 | Q5DQJ3   | Capping protein (Actin filament) muscle 2   | 21 | 19 |
| 771  | P63242   | Eukaryotic translation initiation factor 5A | 21 | 18 |
| 802  | P84078   | ADP-ribosylation factor 1 OS=Mus musci      | 21 | 18 |
| 1155 | Q3U344   | ADP-ribosylation factor 3 OS=Mus musci      | 21 | 18 |
| 725  | P62141   | Serine/threonine-protein phosphatase PP1    | 21 | 17 |
| 2220 | Q922D8   | C-1-tetrahydrofolate synthase, cytoplasmic  | 21 | 17 |

|      |        |                                               |    |    |
|------|--------|-----------------------------------------------|----|----|
| 561  | P23116 | Eukaryotic translation initiation factor 3 si | 21 | 15 |
| 1101 | Q3TW28 | Putative uncharacterized protein OS=Mus       | 21 | 15 |
| 559  | P21956 | Lactadherin OS=Mus musculus GN=Mfgc           | 21 | 14 |
| 829  | Q01705 | Neurogenic locus notch homolog protein        | 21 | 14 |
| 980  | Q3TI61 | Putative uncharacterized protein OS=Mus       | 21 | 13 |
| 2154 | Q8VDM4 | 26S proteasome non-ATPase regulatory si       | 21 | 13 |
| 976  | Q3TI05 | Chaperonin containing Tcp1, subunit 6a (C     | 20 | 25 |
| 999  | Q3TIX8 | Putative uncharacterized protein OS=Mus       | 20 | 25 |
| 1493 | Q52KG9 | Chaperonin containing Tcp1, subunit 6a (C     | 20 | 25 |
| 229  | E9Q3Q6 | CD166 antigen OS=Mus musculus GN=A            | 20 | 22 |
| 210  | E9PWT4 | H-2 class I histocompatibility antigen, Q7    | 20 | 19 |
| 756  | P62984 | Ubiquitin-60S ribosomal protein L40 OS=       | 20 | 19 |
| 1601 | Q5SQB7 | MCG68069 OS=Mus musculus GN=Npm               | 20 | 19 |
| 2267 | Q99PT1 | Rho GDP-dissociation inhibitor 1 OS=M         | 20 | 17 |
| 1744 | Q6IRU2 | Tropomyosin alpha-4 chain OS=Mus mus          | 20 | 16 |
| 701  | P60335 | Poly(rC)-binding protein 1 OS=Mus musc        | 20 | 14 |
| 8    | A1L0U3 | Histone H3 (Fragment) OS=Mus musculu          | 20 | 13 |
| 553  | P19973 | Lymphocyte-specific protein 1 OS=Mus n        | 20 | 13 |
| 1929 | Q8BKCS | Importin-5 OS=Mus musculus GN=Ipo5 I          | 20 | 13 |
| 100  | B1B506 | L-selectin OS=Mus musculus GN=Sell PI         | 20 | 10 |
| 101  | B1B507 | L-selectin OS=Mus musculus GN=Sell PI         | 20 | 10 |
| 669  | P49710 | Hematopoietic lineage cell-specific protei    | 20 | 10 |
| 2529 | Q9WV91 | Prostaglandin F2 receptor negative regula     | 20 | 7  |
| 2193 | Q91XV3 | Brain acid soluble protein 1 OS=Mus mus       | 19 | 31 |
| 511  | P13597 | Intercellular adhesion molecule 1 OS=M        | 19 | 23 |
| 901  | Q3TB10 | Putative uncharacterized protein (Fragmer     | 19 | 23 |
| 962  | Q3THH5 | Putative uncharacterized protein OS=Mus       | 19 | 23 |
| 1203 | Q3U7Q9 | Putative uncharacterized protein OS=Mus       | 19 | 23 |
| 1291 | Q3UDJ5 | Putative uncharacterized protein OS=Mus       | 19 | 23 |
| 1469 | Q4FK06 | Icam1 protein OS=Mus musculus GN=Ica          | 19 | 23 |
| 709  | P61161 | Actin-related protein 2 OS=Mus musculus       | 19 | 19 |
| 859  | Q0PD50 | RAB8A, member RAS oncogene family, i          | 19 | 18 |
| 949  | Q3TGU7 | Proliferation-associated 2G4 OS=Mus mu        | 19 | 18 |
| 1134 | Q3U0D7 | ADP-ribosylation factor 6 OS=Mus musci        | 19 | 18 |
| 1298 | Q3UDZ1 | Ras homolog gene family, member G OS=         | 19 | 18 |
| 776  | P68040 | Guanine nucleotide-binding protein subun      | 19 | 17 |
| 1551 | Q5BL09 | Npm1 protein OS=Mus musculus GN=Np            | 19 | 17 |
| 2471 | Q9QUJ7 | Long-chain-fatty-acid--CoA ligase 4 OS=       | 19 | 17 |
| 476  | P07742 | Ribonucleoside-diphosphate reductase lar      | 19 | 16 |
| 524  | P14733 | Lamin-B1 OS=Mus musculus GN=Lmb               | 19 | 15 |

|      |        |                                             |    |    |
|------|--------|---------------------------------------------|----|----|
| 558  | P21550 | Beta-enolase OS=Mus musculus GN=Eno         | 19 | 15 |
| 643  | P43274 | Histone H1.4 OS=Mus musculus GN=His         | 19 | 14 |
| 700  | P60122 | RuvB-like 1 OS=Mus musculus GN=RuvB         | 19 | 14 |
| 1337 | Q3UJN2 | Putative uncharacterized protein OS=Mus     | 19 | 14 |
| 1670 | Q61599 | Rho GDP-dissociation inhibitor 2 OS=Mus     | 19 | 14 |
| 1331 | Q3UIT9 | Proteasome subunit alpha type OS=Mus n      | 19 | 13 |
| 2558 | Q9Z2U0 | Proteasome subunit alpha type-7 OS=Mus      | 19 | 13 |
| 594  | P28667 | MARCKS-related protein OS=Mus muscu         | 19 | 11 |
| 1429 | Q3UXQ6 | 40S ribosomal protein S4 OS=Mus muscu       | 19 | 10 |
| 1523 | Q545F8 | 40S ribosomal protein S4 OS=Mus muscu       | 19 | 10 |
| 1528 | Q545X8 | 40S ribosomal protein S4 OS=Mus muscu       | 19 | 10 |
| 2547 | Q9Z179 | SHC SH2 domain-binding protein 1 OS=M       | 19 | 7  |
| 343  | G5E829 | Plasma membrane calcium-transporting A      | 18 | 25 |
| 979  | Q3TI59 | Putative uncharacterized protein OS=Mus     | 18 | 24 |
| 223  | E9Q0U7 | Heat shock protein 105 kDa OS=Mus mus       | 18 | 23 |
| 347  | G5E8R2 | Tropomyosin 1, alpha, isoform CRA_k O:      | 18 | 20 |
| 1163 | Q3U4D1 | Adenosylhomocysteinase OS=Mus muscu         | 18 | 19 |
| 631  | P40142 | Transketolase OS=Mus musculus GN=Tk         | 18 | 17 |
| 1693 | Q62261 | Spectrin beta chain, non-erythrocytic 1 O:  | 18 | 17 |
| 484  | P09055 | Integrin beta-1 OS=Mus musculus GN=Itg      | 18 | 16 |
| 858  | Q0PD49 | RAB8B, member RAS oncogene family C         | 18 | 16 |
| 2214 | Q921M7 | Protein FAM49B OS=Mus musculus GN=          | 18 | 16 |
| 1644 | Q60864 | Stress-induced-phosphoprotein 1 OS=Mus      | 18 | 15 |
| 1637 | Q60737 | Casein kinase II subunit alpha OS=Mus m     | 18 | 14 |
| 1660 | Q61177 | Casein kinase II alpha subunit OS=Mus m     | 18 | 14 |
| 2544 | Q9Z0P5 | Twinfilin-2 OS=Mus musculus GN=Twf2         | 18 | 14 |
| 2141 | Q8R366 | Immunoglobulin superfamily member 8 C       | 18 | 13 |
| 1859 | Q80U72 | Protein scribble homolog OS=Mus muscu       | 18 | 10 |
| 565  | P24161 | T-cell surface glycoprotein CD3 zeta chai   | 18 | 9  |
| 322  | G3UY19 | Protein regulator of cytokinesis 1 OS=MU    | 18 | 7  |
| 1153 | Q3U2W2 | MYB binding protein (P160) 1a, isoform t    | 18 | 7  |
| 1639 | Q60767 | Lymphocyte antigen 75 OS=Mus muscul         | 17 | 26 |
| 2076 | Q8CE30 | Putative uncharacterized protein OS=Mus     | 17 | 18 |
| 809  | P97351 | 40S ribosomal protein S3a OS=Mus musc       | 17 | 17 |
| 1176 | Q3U5P8 | 40S ribosomal protein S3a OS=Mus musc       | 17 | 17 |
| 1740 | Q6GT24 | Peroxiredoxin 6 OS=Mus musculus GN=I        | 17 | 16 |
| 1529 | Q546H1 | Linker for activation of T cells, isoform C | 17 | 15 |
| 2020 | Q8C2A3 | Putative uncharacterized protein OS=Mus     | 17 | 15 |
| 518  | P14148 | 60S ribosomal protein L7 OS=Mus muscu       | 17 | 14 |
| 1001 | Q3TJ38 | Putative uncharacterized protein OS=Mus     | 17 | 14 |

|      |          |                                              |    |    |
|------|----------|----------------------------------------------|----|----|
| 1267 | Q3UBI6   | Putative uncharacterized protein OS=Mus      | 17 | 14 |
| 31   | A2AF47   | Dedicator of cytokinesis protein 11 OS=M     | 17 | 13 |
| 2290 | Q9CQV8   | 14-3-3 protein beta/alpha OS=Mus muscu       | 17 | 13 |
| 803  | P84084   | ADP-ribosylation factor 5 OS=Mus muscu       | 17 | 12 |
| 1958 | Q8BQ30   | Phostensin OS=Mus musculus GN=Ppp1r          | 17 | 12 |
| 2246 | Q99KN1   | Arrestin domain-containing protein 1 OS=     | 17 | 12 |
| 1023 | Q3TKM9   | Actin-related protein 2/3 complex subunit    | 17 | 10 |
| 2273 | Q9CPW4   | Actin-related protein 2/3 complex subunit    | 17 | 10 |
| 1850 | Q7TSZ3   | Leucyl-tRNA synthetase OS=Mus muscul         | 17 | 9  |
| 1875 | Q80X90   | Filamin-B OS=Mus musculus GN=Flnb P          | 17 | 3  |
| 456  | P01590   | Interleukin-2 receptor subunit alpha OS=     | 16 | 22 |
| 1804 | Q6ZWV3   | 60S ribosomal protein L10 OS=Mus musc        | 16 | 19 |
| 655  | P47757-2 | Isoform 2 of F-actin-capping protein subu    | 16 | 18 |
| 571  | P25444   | 40S ribosomal protein S2 OS=Mus muscu        | 16 | 15 |
| 825  | P99027   | 60S acidic ribosomal protein P2 OS=Mus       | 16 | 15 |
| 1028 | Q3TL20   | Putative uncharacterized protein OS=Mus      | 16 | 15 |
| 1035 | Q3TLE5   | Putative uncharacterized protein OS=Mus      | 16 | 15 |
| 1119 | Q3TXS9   | Putative uncharacterized protein OS=Mus      | 16 | 15 |
| 2331 | Q9CYL5   | Golgi-associated plant pathogenesis-relate   | 16 | 15 |
| 545  | P18181   | CD48 antigen OS=Mus musculus GN=Cd           | 16 | 13 |
| 1771 | Q6P905   | CD48 antigen OS=Mus musculus GN=Cd           | 16 | 13 |
| 107  | B2M1R7   | Poly(RC) binding protein 2 OS=Mus musc       | 16 | 12 |
| 833  | Q02242   | Programmed cell death protein 1 OS=Mus       | 16 | 12 |
| 1688 | Q61990   | Poly(rC)-binding protein 2 OS=Mus musc       | 16 | 12 |
| 1689 | Q61990-3 | Isoform 3 of Poly(rC)-binding protein 2 O    | 16 | 12 |
| 891  | Q3TA56   | P-selectin glycoprotein ligand 1 OS=Mus      | 16 | 11 |
| 1136 | Q3U0F1   | Putative uncharacterized protein OS=Mus      | 16 | 11 |
| 1692 | Q62170   | P-selectin glycoprotein ligand 1 OS=Mus      | 16 | 11 |
| 2250 | Q99L34   | Selectin, platelet (P-selectin) ligand OS=   | 16 | 11 |
| 2338 | Q9CZD3   | Glycine--tRNA ligase OS=Mus musculus         | 16 | 10 |
| 367  | J3QNK8   | Abl interactor 1 OS=Mus musculus GN=/        | 16 | 9  |
| 560  | P22646   | T-cell surface glycoprotein CD3 epsilon c    | 16 | 8  |
| 2098 | Q8CIJ3   | Eukaryotic translation initiation factor 3 s | 16 | 6  |
| 2101 | Q8JZQ9   | Eukaryotic translation initiation factor 3 s | 16 | 6  |
| 790  | P70429   | Ena/VASP-like protein OS=Mus musculu         | 16 | 3  |
| 703  | P60766   | Cell division control protein 42 homolog (   | 15 | 19 |
| 2133 | Q8R0J7   | Vacuolar protein sorting-associated protei   | 15 | 17 |
| 2135 | Q8R1B4   | Eukaryotic translation initiation factor 3 s | 15 | 16 |
| 1981 | Q8BU31   | Ras-related protein Rap-2c OS=Mus musc       | 15 | 14 |
| 420  | O54901   | OX-2 membrane glycoprotein OS=Mus m          | 15 | 13 |

|      |              |                                            |    |    |
|------|--------------|--------------------------------------------|----|----|
| 1495 | Q52L97       | Importin subunit alpha OS=Mus musculus     | 15 | 13 |
| 2009 | Q8C147       | Dedicator of cytokinesis protein 8 OS=Mu   | 15 | 13 |
|      | 587 P27773   | Protein disulfide-isomerase A3 OS=Mus r    | 15 | 12 |
| 1234 | Q3U9J9       | Putative uncharacterized protein OS=Mus    | 15 | 12 |
| 1505 | Q542J3       | Protein tyrosine phosphatase receptor type | 15 | 12 |
|      | 321 G3UXZ5   | Proteasome activator complex subunit 1 (l  | 15 | 11 |
|      | 812 P97371   | Proteasome activator complex subunit 1 C   | 15 | 11 |
| 1732 | Q6A0D4       | Raftlin OS=Mus musculus GN=Rftn1 PE-       | 15 | 11 |
|      | 259 E9QAZ2   | Ribosomal protein L15 OS=Mus musculu       | 15 | 10 |
|      | 916 Q3TDA7   | Protein kinase C and casein kinase substra | 15 | 10 |
| 1573 | Q5M8Q0       | Ribosomal protein L15 OS=Mus musculu       | 15 | 10 |
|      | 653 P47741   | Tumor necrosis factor receptor superfamil  | 15 | 9  |
|      | 663 P48036   | Annexin A5 OS=Mus musculus GN=Anx          | 15 | 9  |
| 1806 | Q6ZWX2       | Thymosin, beta 4, X chromosome OS=Mu       | 15 | 6  |
| 1517 | Q544H9       | Protein phosphatase 1 regulatory inhibitor | 15 | 2  |
|      | 592 P28656   | Nucleosome assembly protein 1-like 1 OS    | 14 | 19 |
|      | 932 Q3TF41   | Nucleosome assembly protein 1-like 1, isc  | 14 | 19 |
| 1962 | Q8BSH9       | Nucleosome assembly protein 1-like 1, isc  | 14 | 19 |
|      | 722 P62071   | Ras-related protein R-Ras2 OS=Mus musc     | 14 | 16 |
|      | 586 P27661   | Histone H2AX OS=Mus musculus GN=H          | 14 | 14 |
|      | 837 Q05144   | Ras-related C3 botulinum toxin substrate   | 14 | 14 |
|      | 945 Q3TGC5   | Putative uncharacterized protein OS=Mus    | 14 | 12 |
| 1442 | Q3V117       | ATP-citrate synthase OS=Mus musculus C     | 14 | 12 |
| 1564 | Q5EBQ2       | MCG7941, isoform CRA_f OS=Mus mus          | 14 | 12 |
| 1718 | Q64735       | Complement component receptor 1-like p     | 14 | 12 |
|      | 607 P32883-2 | Isoform 2B of GTPase KRas OS=Mus mu        | 14 | 11 |
| 2013 | Q8C1B7       | Septin-11 OS=Mus musculus GN=Sept11        | 14 | 11 |
| 1661 | Q61187       | Tumor susceptibility gene 101 protein OS   | 14 | 10 |
|      | 263 E9QKK8   | Phospholipid-transporting ATPase OS=M      | 14 | 8  |
|      | 793 P70460   | Vasodilator-stimulated phosphoprotein O    | 14 | 8  |
| 2493 | Q9QZW0       | Phospholipid-transporting ATPase 11C O     | 14 | 8  |
|      | 651 P46471   | 26S protease regulatory subunit 7 OS=Mu    | 14 | 7  |
| 1980 | Q8BU30       | Isoleucine--tRNA ligase, cytoplasmic OS-   | 14 | 7  |
|      | 337 G3X9V0   | MCG22048, isoform CRA_a OS=Mus m           | 14 | 6  |
|      | 714 P61226   | Ras-related protein Rap-2b OS=Mus musc     | 13 | 15 |
| 2203 | Q91Z67       | SLIT-ROBO Rho GTPase-activating prot       | 13 | 15 |
|      | 339 G3XA10   | Heterogeneous nuclear ribonucleoprotein    | 13 | 14 |
| 1096 | Q3TVV6       | Putative uncharacterized protein OS=Mus    | 13 | 14 |
| 1121 | Q3TXW2       | Putative uncharacterized protein OS=Mus    | 13 | 14 |
| 2018 | Q8C290       | Putative uncharacterized protein OS=Mus    | 13 | 14 |

|      |        |                                            |    |    |
|------|--------|--------------------------------------------|----|----|
| 2162 | Q8VEK3 | Heterogeneous nuclear ribonucleoprotein    | 13 | 14 |
| 127  | B6ZHC8 | Erythrocyte protein band 4.1 OS=Mus mu     | 13 | 13 |
| 661  | P47963 | 60S ribosomal protein L13 OS=Mus musc      | 13 | 13 |
| 762  | P63028 | Translationally-controlled tumor protein C | 13 | 13 |
| 1224 | Q3U8Y7 | Putative uncharacterized protein OS=Mus    | 13 | 13 |
| 1801 | Q6ZWN5 | 40S ribosomal protein S9 OS=Mus muscu      | 13 | 13 |
| 1855 | Q80T06 | Elongation factor 1-delta OS=Mus muscu     | 13 | 13 |
| 2048 | Q8C6A3 | Putative uncharacterized protein OS=Mus    | 13 | 13 |
| 611  | P34022 | Ran-specific GTPase-activating protein O   | 13 | 12 |
| 1375 | Q3ULZ3 | Phosphoserine aminotransferase OS=Mus      | 13 | 12 |
| 1512 | Q543K5 | Phosphoserine aminotransferase OS=Mus      | 13 | 12 |
| 2560 | Q9Z2X1 | Heterogeneous nuclear ribonucleoprotein    | 13 | 12 |
| 1160 | Q3U3T6 | Putative uncharacterized protein OS=Mus    | 13 | 11 |
| 1282 | Q3UD67 | Putative uncharacterized protein OS=Mus    | 13 | 11 |
| 1793 | Q6XMP4 | Alanyl-tRNA synthase OS=Mus musculu        | 13 | 11 |
| 1906 | Q8BGQ7 | Alanine--tRNA ligase, cytoplasmic OS=M     | 13 | 11 |
| 2244 | Q99KH8 | Serine/threonine-protein kinase 24 OS=M    | 13 | 11 |
| 199  | E9PUF7 | Rho guanine nucleotide exchange factor 1   | 13 | 10 |
| 527  | P15532 | Nucleoside diphosphate kinase A OS=M       | 13 | 10 |
| 758  | P63001 | Ras-related C3 botulinum toxin substrate   | 13 | 10 |
| 855  | Q09143 | High affinity cationic amino acid transpor | 13 | 10 |
| 1037 | Q3TLP8 | RAS-related C3 botulinum substrate 1, isc  | 13 | 10 |
| 1296 | Q3UDV5 | Putative uncharacterized protein OS=Mus    | 13 | 10 |
| 1408 | Q3UTL4 | Putative uncharacterized protein OS=Mus    | 13 | 10 |
| 1470 | Q4FK16 | Plscr1 protein OS=Mus musculus GN=Pls      | 13 | 10 |
| 1567 | Q5FWB6 | 60S acidic ribosomal protein P0 OS=Mus     | 13 | 10 |
| 1574 | Q5M8R8 | 60S acidic ribosomal protein P0 OS=Mus     | 13 | 10 |
| 1952 | Q8BPG5 | Putative uncharacterized protein OS=Mus    | 13 | 10 |
| 2259 | Q99M50 | Plscr1 protein OS=Mus musculus GN=Pls      | 13 | 10 |
| 2383 | Q9D859 | Putative uncharacterized protein OS=Mus    | 13 | 10 |
| 2448 | Q9JJ00 | Phospholipid scramblase 1 OS=Mus musc      | 13 | 10 |
| 407  | O35598 | Disintegrin and metalloproteinase domain   | 13 | 9  |
| 453  | P00493 | Hypoxanthine-guanine phosphoribosyltra     | 13 | 9  |
| 572  | P25799 | Nuclear factor NF-kappa-B p105 subunit (   | 13 | 9  |
| 699  | P59999 | Actin-related protein 2/3 complex subunit  | 13 | 9  |
| 911  | Q3TCZ2 | Solute carrier family 29 (Nucleoside trans | 13 | 9  |
| 2007 | Q8C129 | Leucyl-cystinyl aminopeptidase OS=Mus      | 13 | 9  |
| 2192 | Q91XT3 | Stathmin OS=Mus musculus GN=Stmn1 l        | 13 | 9  |
| 2243 | Q99KF5 | Hypoxanthine guanine phosphoribosyl tra    | 13 | 9  |
| 2369 | Q9D2V7 | Coronin-7 OS=Mus musculus GN=Coro7         | 13 | 9  |

|      |          |                                           |    |    |
|------|----------|-------------------------------------------|----|----|
| 2370 | Q9D3C4   | Actin-related protein 2/3 complex subunit | 13 | 9  |
| 660  | P47962   | 60S ribosomal protein L5 OS=Mus muscu     | 13 | 8  |
| 1209 | Q3U850   | Putative uncharacterized protein OS=Mus   | 13 | 8  |
| 1448 | Q3V3E1   | Ubiquitin-associated and SH3 domain-cor   | 13 | 7  |
| 610  | P33174   | Chromosome-associated kinesin KIF4 OS     | 13 | 6  |
| 2446 | Q9JIK5   | Nucleolar RNA helicase 2 OS=Mus musc      | 13 | 6  |
| 1900 | Q8BG67   | Protein EFR3 homolog A OS=Mus muscu       | 13 | 3  |
| 246  | E9Q6R7   | Protein Utrn OS=Mus musculus GN=Utrn      | 13 | 2  |
| 1082 | Q3TTA7   | E3 ubiquitin-protein ligase CBL-B OS=M    | 13 | 0  |
| 249  | E9Q828   | Calcium-transporting ATPase OS=Mus m      | 12 | 33 |
| 350  | H2BL43   | Calcium-transporting ATPase OS=Mus m      | 12 | 33 |
| 103  | B2CSK2   | Heat shock protein 1-like protein OS=Mus  | 12 | 14 |
| 162  | D3YTN4   | GTPase IMAP family member 4 OS=Mus        | 12 | 14 |
| 533  | P16627   | Heat shock 70 kDa protein 1-like OS=Mus   | 12 | 14 |
| 599  | P30416   | Peptidyl-prolyl cis-trans isomerase FKBP  | 12 | 14 |
| 1677 | Q61735-2 | Isoform 2 of Leukocyte surface antigen C  | 12 | 14 |
| 2496 | Q9R0G6   | Cartilage oligomeric matrix protein OS=M  | 12 | 14 |
| 104  | B2CY77   | Laminin receptor (Fragment) OS=Mus m      | 12 | 13 |
| 621  | P35979   | 60S ribosomal protein L12 OS=Mus musc     | 12 | 13 |
| 678  | P51150   | Ras-related protein Rab-7a OS=Mus musc    | 12 | 12 |
| 1044 | Q3TMA0   | Putative uncharacterized protein OS=Mus   | 12 | 12 |
| 1328 | Q3UII2   | Tetraspanin OS=Mus musculus GN=Cd82       | 12 | 12 |
| 1613 | Q5SW88   | Protein Rab1a OS=Mus musculus GN=Rab      | 12 | 12 |
| 1909 | Q8BH43   | Wiskott-Aldrich syndrome protein family   | 12 | 12 |
| 2033 | Q8C2Q7   | Heterogeneous nuclear ribonucleoprotein   | 12 | 12 |
| 1626 | Q5YLW3   | 40S ribosomal protein S3 OS=Mus muscu     | 12 | 11 |
| 2027 | Q8C2K1   | Differentially expressed in FDCP 6 OS=M   | 12 | 11 |
| 2295 | Q9CR16   | Peptidyl-prolyl cis-trans isomerase D OS= | 12 | 11 |
| 857  | Q0PD35   | RAB21, member RAS oncogene family O       | 12 | 10 |
| 1303 | Q3UEI6   | Putative uncharacterized protein OS=Mus   | 12 | 10 |
| 1335 | Q3UJK2   | Putative uncharacterized protein OS=Mus   | 12 | 10 |
| 1380 | Q3UMP4   | Plasminogen activator inhibitor 1 RNA-bi  | 12 | 10 |
| 1409 | Q3UTP8   | Amino acid transporter OS=Mus musculu     | 12 | 10 |
| 1998 | Q8BXT5   | Amino acid transporter OS=Mus musculu     | 12 | 10 |
| 2326 | Q9CY58   | Plasminogen activator inhibitor 1 RNA-bi  | 12 | 10 |
| 2327 | Q9CY58-2 | Isoform 2 of Plasminogen activator inhibi | 12 | 10 |
| 392  | O09044   | Synaptosomal-associated protein 23 OS=M   | 12 | 9  |
| 838  | Q05816   | Fatty acid-binding protein, epidermal OS= | 12 | 9  |
| 1190 | Q3U6F6   | Putative uncharacterized protein OS=Mus   | 12 | 9  |
| 1204 | Q3U7R1   | Extended synaptotagmin-1 OS=Mus musc      | 12 | 9  |



|      |          |                                              |    |    |
|------|----------|----------------------------------------------|----|----|
| 1481 | Q4VA10   | Ras homolog gene family, member f OS=        | 12 | 9  |
| 2284 | Q9CQ16   | Coactosin-like protein OS=Mus musculus       | 12 | 9  |
| 2362 | Q9D1G1   | Ras-related protein Rab-1B OS=Mus mus        | 12 | 9  |
| 2373 | Q9D3L3   | Synaptosomal-associated protein OS=Mus       | 12 | 9  |
| 297  | F6YVP7   | Protein Gm10260 OS=Mus musculus GN=          | 12 | 8  |
| 1533 | Q561N5   | 40S ribosomal protein S18 OS=Mus musc        | 12 | 8  |
| 1753 | Q6NZJ6   | Eukaryotic translation initiation factor 4 g | 12 | 7  |
| 394  | O09126   | Semaphorin-4D OS=Mus musculus GN=            | 12 | 4  |
| 1920 | Q8BJC1   | Putative uncharacterized protein (Fragmer    | 12 | 4  |
| 2158 | Q8VDZ4   | Palmitoyltransferase ZDHHC5 OS=Mus r         | 12 | 4  |
| 555  | P20152   | Vimentin OS=Mus musculus GN=Vim PI           | 11 | 23 |
| 601  | P31041   | T-cell-specific surface glycoprotein CD28    | 11 | 16 |
| 2072 | Q8CDB3   | Putative uncharacterized protein OS=Mus      | 11 | 16 |
| 1440 | Q3V014   | H-2 class I histocompatibility antigen, D-   | 11 | 15 |
| 1046 | Q3TMC5   | Putative uncharacterized protein OS=Mus      | 11 | 14 |
| 2441 | Q9JHU4   | Cytoplasmic dynein 1 heavy chain 1 OS=]      | 11 | 13 |
| 113  | B2RTL6   | Thrombospondin 4 OS=Mus musculus GN          | 11 | 12 |
| 506  | P12382   | ATP-dependent 6-phosphofructokinase, li      | 11 | 12 |
| 1251 | Q3UAG2   | 6-phosphogluconate dehydrogenase, deca       | 11 | 12 |
| 2169 | Q91V28   | 6-phosphogluconate dehydrogenase, deca       | 11 | 12 |
| 2274 | Q9CQ43   | Deoxyuridine triphosphatase OS=Mus mu        | 11 | 12 |
| 2409 | Q9DCD0   | 6-phosphogluconate dehydrogenase, deca       | 11 | 12 |
| 507  | P12815   | Programmed cell death protein 6 OS=Mus       | 11 | 11 |
| 774  | P63330   | Serine/threonine-protein phosphatase 2A c    | 11 | 11 |
| 2463 | Q9JLB0-2 | Isoform Alpha of MAGUK p55 subfamily         | 11 | 11 |
| 741  | P62827   | GTP-binding nuclear protein Ran OS=MU        | 11 | 10 |
| 763  | P63037   | DnaJ homolog subfamily A member 1 OS         | 11 | 10 |
| 792  | P70452   | Syntaxin-4 OS=Mus musculus GN=Stx4 l         | 11 | 10 |
| 1374 | Q3ULW0   | Putative uncharacterized protein OS=Mus      | 11 | 10 |
| 2506 | Q9R1P0   | Proteasome subunit alpha type-4 OS=Mus       | 11 | 10 |
| 29   | A2AD84   | Serine/threonine-protein kinase 26 OS=M      | 11 | 9  |
| 30   | A2AD85   | Serine/threonine-protein kinase 26 OS=M      | 11 | 9  |
| 2232 | Q99020   | Heterogeneous nuclear ribonucleoprotein      | 11 | 9  |
| 2356 | Q9D0I9   | Arginine--tRNA ligase, cytoplasmic OS=]      | 11 | 9  |
| 274  | E9QMX7   | Rho GTPase-activating protein 30 OS=M        | 11 | 8  |
| 828  | Q01320   | DNA topoisomerase 2-alpha OS=Mus mu          | 11 | 8  |
| 1170 | Q3U4Y3   | CD3 antigen gamma polypeptide OS=MU          | 11 | 8  |
| 1706 | Q640N3   | Rho GTPase-activating protein 30 OS=M        | 11 | 8  |
| 1242 | Q3UA23   | Protein disulfide-isomerase OS=Mus mus       | 11 | 7  |
| 764  | P63038   | 60 kDa heat shock protein, mitochondrial     | 11 | 6  |

|      |          |                                             |    |    |
|------|----------|---------------------------------------------|----|----|
| 898  | Q3TAS3   | Stx11 protein OS=Mus musculus GN=Stx        | 11 | 6  |
| 1184 | Q3U5V8   | MCG49559 OS=Mus musculus GN=Stx1            | 11 | 6  |
| 2371 | Q9D3G5   | Syntaxin-11 OS=Mus musculus GN=Stx1         | 11 | 6  |
| 2536 | Q9Z0F4   | Calcium and integrin-binding protein 1 OS=  | 11 | 5  |
| 2484 | Q9QYI3   | DnaJ homolog subfamily C member 7 OS        | 11 | 4  |
| 1466 | Q4FJX4   | Csrp1 protein OS=Mus musculus GN=Csrp1      | 11 | 3  |
| 1566 | Q5F283   | Phospholipid scramblase 3 OS=Mus musc       | 10 | 13 |
| 480  | P08228   | Superoxide dismutase [Cu-Zn] OS=Mus m       | 10 | 12 |
| 2455 | Q9JKB3   | Y-box-binding protein 3 OS=Mus muscul       | 10 | 12 |
| 860  | Q0PD65   | RAB2, member RAS oncogene family OS         | 10 | 11 |
| 1491 | Q50HX4   | RAB14 protein OS=Mus musculus GN=R          | 10 | 11 |
| 1799 | Q6ZQF2   | MKIAA0253 protein (Fragment) OS=Mus         | 10 | 11 |
| 143  | B7ZP22   | Heterogeneous nuclear ribonucleoprotein     | 10 | 10 |
| 442  | O88569   | Heterogeneous nuclear ribonucleoproteins    | 10 | 10 |
| 619  | P35762   | CD81 antigen OS=Mus musculus GN=Cd          | 10 | 10 |
| 671  | P49722   | Proteasome subunit alpha type-2 OS=Mus      | 10 | 10 |
| 1423 | Q3UWG5   | Tetraspanin OS=Mus musculus GN=Cd81         | 10 | 10 |
| 1426 | Q3UWT6   | Proteasome subunit alpha type OS=Mus n      | 10 | 10 |
| 2361 | Q9D1C8   | Vacuolar protein sorting-associated protei  | 10 | 10 |
| 490  | P0C0S6   | Histone H2A.Z OS=Mus musculus GN=H          | 10 | 9  |
| 542  | P17918   | Proliferating cell nuclear antigen OS=Mus   | 10 | 9  |
| 1594 | Q5RJV5   | Polypyrimidine tract binding protein 1 OS   | 10 | 9  |
| 1946 | Q8BP47   | Asparagine--tRNA ligase, cytoplasmic OS     | 10 | 9  |
| 2204 | Q91ZH2   | Proliferating cell nuclear antigen OS=Mus   | 10 | 9  |
| 306  | F8VQC9   | Anion exchange protein OS=Mus muscul        | 10 | 8  |
| 638  | P42227   | Signal transducer and activator of transcri | 10 | 8  |
| 1196 | Q3U6S9   | Signal transducer and activator of transcri | 10 | 8  |
| 1419 | Q3UVN5   | Putative uncharacterized protein OS=Mus     | 10 | 8  |
| 1826 | Q7TMK9-2 | Isoform 2 of Heterogeneous nuclear ribon    | 10 | 8  |
| 2336 | Q9CZ44   | NSFL1 cofactor p47 OS=Mus musculus C        | 10 | 8  |
| 647  | P45376   | Aldose reductase OS=Mus musculus GN=        | 10 | 7  |
| 648  | P46061   | Ran GTPase-activating protein 1 OS=Mus      | 10 | 7  |
| 681  | P53996   | Cellular nucleic acid-binding protein OS=   | 10 | 7  |
| 909  | Q3TCL2   | Putative uncharacterized protein (Fragmer   | 10 | 7  |
| 1002 | Q3TJ39   | RAB5C, member RAS oncogene family, i        | 10 | 7  |
| 1182 | Q3U5V2   | Putative uncharacterized protein OS=Mus     | 10 | 7  |
| 1619 | Q5U415   | Aldo-keto reductase family 1, member B3     | 10 | 7  |
| 1795 | Q6ZPH4   | MKIAA1835 protein (Fragment) OS=Mus         | 10 | 7  |
| 2200 | Q91YS2   | Rangap1 protein OS=Mus musculus GN=         | 10 | 7  |
| 695  | P58044   | Isopentenyl-diphosphate Delta-isomerase     | 10 | 6  |

|      |          |                                                    |    |    |
|------|----------|----------------------------------------------------|----|----|
| 850  | Q08093   | Calponin-2 OS=Mus musculus GN=Cnn2                 | 10 | 6  |
| 1127 | Q3TYV5   | 2',3'-cyclic-nucleotide 3'-phosphodiesterase       | 10 | 6  |
| 82   | B1ASP2   | Tyrosine-protein kinase OS=Mus musculus            | 10 | 5  |
| 94   | B1AYC9   | Amyloid beta (A4) protein-binding, family          | 10 | 5  |
| 636  | P42209   | Septin-1 OS=Mus musculus GN=Sept1 Pl               | 10 | 5  |
| 1401 | Q3URU8   | Tyrosine-protein kinase OS=Mus musculus            | 10 | 5  |
| 2045 | Q8C503   | Signaling threshold-regulating transmembrane       | 10 | 5  |
| 97   | B1AZ46   | Brain-specific angiogenesis inhibitor 1-associated | 10 | 3  |
| 1422 | Q3UW53   | Protein Niban OS=Mus musculus GN=Fa                | 10 | 3  |
| 1934 | Q8BKX1   | Brain-specific angiogenesis inhibitor 1-associated | 10 | 3  |
| 1935 | Q8BKX1-2 | Isoform 2 of Brain-specific angiogenesis inhibitor | 10 | 3  |
| 1936 | Q8BKX1-3 | Isoform 3 of Brain-specific angiogenesis inhibitor | 10 | 3  |
| 2429 | Q9ES61   | Chandra protein OS=Mus musculus GN=l               | 10 | 3  |
| 540  | P17809   | Solute carrier family 2, facilitated glucose       | 9  | 11 |
| 1151 | Q3U2J2   | Putative uncharacterized protein OS=Mus            | 9  | 11 |
| 1461 | Q4FJL0   | RAB10, member RAS oncogene family C                | 9  | 11 |
| 1550 | Q58EW0   | 60S ribosomal protein L18 OS=Mus musculus          | 9  | 11 |
| 1709 | Q642K1   | Ribosomal protein L18 OS=Mus musculus              | 9  | 11 |
| 380  | O08553   | Dihydropyrimidinase-related protein 2 OS           | 9  | 10 |
| 517  | P14131   | 40S ribosomal protein S16 OS=Mus musculus          | 9  | 10 |
| 2311 | Q9CWW5   | Putative uncharacterized protein OS=Mus            | 9  | 10 |
| 2324 | Q9CXZ9   | Putative uncharacterized protein OS=Mus            | 9  | 10 |
| 146  | B7ZWC4   | Insulin-like growth factor 2 receptor OS=l         | 9  | 9  |
| 278  | E9QNY6   | B- and T-lymphocyte attenuator OS=Mus              | 9  | 9  |
| 430  | O70194   | Eukaryotic translation initiation factor 3 subunit | 9  | 9  |
| 713  | P61222   | ATP-binding cassette sub-family E member           | 9  | 9  |
| 734  | P62334   | 26S protease regulatory subunit 10B OS=l           | 9  | 9  |
| 848  | Q07113   | Cation-independent mannose-6-phosphate             | 9  | 9  |
| 997  | Q3TIU8   | Putative uncharacterized protein OS=Mus            | 9  | 9  |
| 1750 | Q6NXX7   | Abce1 protein (Fragment) OS=Mus musculus           | 9  | 9  |
| 1811 | Q6ZWZ6   | 40S ribosomal protein S12 OS=Mus musculus          | 9  | 9  |
| 1847 | Q7TSA3   | B- and T-lymphocyte attenuator OS=Mus              | 9  | 9  |
| 1848 | Q7TSA3-3 | Isoform 3 of B- and T-lymphocyte attenuator        | 9  | 9  |
| 2468 | Q9JM76   | Actin-related protein 2/3 complex subunit          | 9  | 9  |
| 433  | O70296   | G protein-coupled receptor kinase 6 OS=M           | 9  | 8  |
| 478  | P08030   | Adenine phosphoribosyltransferase OS=M             | 9  | 8  |
| 556  | P20334   | Tumor necrosis factor receptor superfamily         | 9  | 8  |
| 1095 | Q3TVR4   | Putative uncharacterized protein OS=Mus            | 9  | 8  |
| 1397 | Q3UQM7   | Putative uncharacterized protein OS=Mus            | 9  | 8  |
| 2546 | Q9Z127   | Large neutral amino acids transporter sma          | 9  | 8  |

|      |        |                                               |   |    |
|------|--------|-----------------------------------------------|---|----|
| 175  | D3Z0N6 | Tetraspanin (Fragment) OS=Mus musculu         | 9 | 7  |
| 227  | E9Q2X8 | Tetraspanin OS=Mus musculus GN=Cd37           | 9 | 7  |
| 1147 | Q3U1W9 | Tetraspanin OS=Mus musculus GN=Cd37           | 9 | 7  |
| 1161 | Q3U429 | Tetraspanin OS=Mus musculus GN=Cd37           | 9 | 7  |
| 1489 | Q505B1 | Rpl17 protein (Fragment) OS=Mus muscu         | 9 | 7  |
| 1667 | Q61470 | Leukocyte antigen CD37 OS=Mus muscu           | 9 | 7  |
| 1812 | Q6ZWZ7 | 60S ribosomal protein L17 OS=Mus musc         | 9 | 7  |
| 1868 | Q80V08 | Rpl17 protein (Fragment) OS=Mus muscu         | 9 | 7  |
| 2126 | Q8QZY1 | Eukaryotic translation initiation factor 3 si | 9 | 7  |
| 2270 | Q9CPR4 | 60S ribosomal protein L17 OS=Mus musc         | 9 | 7  |
| 2297 | Q9CR57 | 60S ribosomal protein L14 OS=Mus musc         | 9 | 7  |
| 2354 | Q9D0E1 | Heterogeneous nuclear ribonucleoprotein       | 9 | 7  |
| 378  | N0E4C0 | Casein kinase II subunit beta OS=Mus mu       | 9 | 6  |
| 464  | P05063 | Fructose-bisphosphate aldolase C OS=MU        | 9 | 6  |
| 729  | P62281 | 40S ribosomal protein S11 OS=Mus musc         | 9 | 6  |
| 759  | P63005 | Platelet-activating factor acetylhydrolase I  | 9 | 6  |
| 775  | P67871 | Casein kinase II subunit beta OS=Mus mu       | 9 | 6  |
| 990  | Q3TIK0 | Platelet-activating factor acetylhydrolase I  | 9 | 6  |
| 1009 | Q3TJG1 | Platelet-activating factor acetylhydrolase I  | 9 | 6  |
| 1318 | Q3UGR6 | Platelet-activating factor acetylhydrolase I  | 9 | 6  |
| 576  | P26350 | Prothymosin alpha OS=Mus musculus GN          | 9 | 5  |
| 602  | P31230 | Aminoacyl tRNA synthase complex-intera        | 9 | 5  |
| 742  | P62830 | 60S ribosomal protein L23 OS=Mus musc         | 9 | 5  |
| 1189 | Q3U6E4 | Putative uncharacterized protein OS=Mus       | 9 | 5  |
| 1435 | Q3UZG4 | Aminoacyl tRNA synthase complex-intera        | 9 | 5  |
| 2470 | Q9JMH6 | Thioredoxin reductase 1, cytoplasmic OS=      | 9 | 5  |
| 567  | P24527 | Leukotriene A-4 hydrolase OS=Mus musc         | 9 | 4  |
| 595  | P28843 | Dipeptidyl peptidase 4 OS=Mus musculus        | 9 | 4  |
| 622  | P37217 | Early activation antigen CD69 OS=Mus n        | 9 | 4  |
| 1069 | Q3TR43 | Putative uncharacterized protein OS=Mus       | 9 | 4  |
| 1511 | Q543H0 | MCG16662 OS=Mus musculus GN=Srm               | 9 | 4  |
| 2513 | Q9R1T4 | Septin-6 OS=Mus musculus GN=Sept6 Pl          | 9 | 4  |
| 2535 | Q9Z0E6 | Guanylate-binding protein 1 OS=Mus mu:        | 9 | 4  |
| 2565 | S4R219 | DENN domain-containing protein 2D OS=         | 9 | 4  |
| 827  | Q00651 | Integrin alpha-4 OS=Mus musculus GN=I         | 9 | 3  |
| 2170 | Q91V35 | Receptor-type tyrosine-protein phosphata      | 9 | 3  |
| 1794 | Q6ZPE2 | Myotubularin-related protein 5 OS=Mus r       | 9 | 2  |
| 418  | O54824 | Pro-interleukin-16 OS=Mus musculus GN         | 9 | 0  |
| 1396 | Q3UQ44 | Ras GTPase-activating-like protein IQGA       | 8 | 16 |
| 847  | Q07076 | Annexin A7 OS=Mus musculus GN=Anx             | 8 | 11 |

|      |          |                                              |   |    |
|------|----------|----------------------------------------------|---|----|
| 1004 | Q3TJ49   | Annexin OS=Mus musculus GN=Anxa7 F           | 8 | 11 |
| 1427 | Q3UWW9   | Putative uncharacterized protein OS=Mus      | 8 | 11 |
| 1898 | Q8BG32   | 26S proteasome non-ATPase regulatory su      | 8 | 11 |
| 2218 | Q922A2   | Annexin OS=Mus musculus GN=Anxa7 F           | 8 | 11 |
| 1895 | Q8BFY9   | Transportin-1 OS=Mus musculus GN=Tn          | 8 | 10 |
| 1896 | Q8BFY9-2 | Isoform 2 of Transportin-1 OS=Mus musc       | 8 | 10 |
| 1102 | Q3TW51   | Putative uncharacterized protein OS=Mus      | 8 | 9  |
| 1436 | Q3UZI3   | Putative uncharacterized protein OS=Mus      | 8 | 9  |
| 1816 | Q78PY7   | Staphylococcal nuclease domain-containi      | 8 | 9  |
| 2399 | Q9DBR7   | Protein phosphatase 1 regulatory subunit 1   | 8 | 9  |
| 289  | F6RPJ9   | Insulin-degrading enzyme (Fragment) OS=      | 8 | 8  |
| 635  | P42208   | Septin-2 OS=Mus musculus GN=Sept2 Pl         | 8 | 8  |
| 927  | Q3TEK8   | CD8 antigen, beta chain 1 OS=Mus muscu       | 8 | 8  |
| 2491 | Q9QZQ8   | Core histone macro-H2A.1 OS=Mus musc         | 8 | 8  |
| 2492 | Q9QZQ8-2 | Isoform 1 of Core histone macro-H2A.1 C      | 8 | 8  |
| 401  | O35379   | Multidrug resistance-associated protein 1    | 8 | 7  |
| 673  | P50396   | Rab GDP dissociation inhibitor alpha OS=     | 8 | 7  |
| 939  | Q3TFF0   | Putative uncharacterized protein OS=Mus      | 8 | 7  |
| 1059 | Q3TNN6   | Putative uncharacterized protein OS=Mus      | 8 | 7  |
| 1561 | Q5DW69   | CD226 antigen OS=Mus musculus GN=C           | 8 | 7  |
| 1571 | Q5I0T8   | Ribosomal protein L19 OS=Mus musculu         | 8 | 7  |
| 1802 | Q6ZWQ9   | MCG5400 OS=Mus musculus GN=My11              | 8 | 7  |
| 2252 | Q99LB4   | Capping protein (Actin filament), gelsolin   | 8 | 7  |
| 2485 | Q9QYJ0   | DnaJ homolog subfamily A member 2 OS         | 8 | 7  |
| 446  | O88890   | SH2 domain-containing protein 1A OS=N        | 8 | 6  |
| 521  | P14211   | Calreticulin OS=Mus musculus GN=Calr         | 8 | 6  |
| 568  | P24547   | Inosine-5'-monophosphate dehydrogenase       | 8 | 6  |
| 991  | Q3TIK8   | Putative uncharacterized protein OS=Mus      | 8 | 6  |
| 1236 | Q3U9N8   | Inosine-5'-monophosphate dehydrogenase       | 8 | 6  |
| 1286 | Q3UDF8   | Putative uncharacterized protein OS=Mus      | 8 | 6  |
| 1329 | Q3UIJ2   | Putative uncharacterized protein OS=Mus      | 8 | 6  |
| 1424 | Q3UWP8   | Putative uncharacterized protein (Fragmer    | 8 | 6  |
| 1815 | Q78HU3   | Multivesicular body subunit 12A OS=M         | 8 | 6  |
| 2008 | Q8C145   | Zinc transporter ZIP6 OS=Mus musculus        | 8 | 6  |
| 2423 | Q9ERK4   | Exportin-2 OS=Mus musculus GN=Cse11          | 8 | 6  |
| 2543 | Q9Z0N1   | Eukaryotic translation initiation factor 2 s | 8 | 6  |
| 2569 | W0BZ77   | SLAM-associated protein isoform SAP-2        | 8 | 6  |
| 856  | Q0GUM3   | Interferon-gamma-inducible p47 GTPase        | 8 | 5  |
| 1087 | Q3TUI9   | Proteasome subunit alpha type OS=Mus n       | 8 | 5  |
| 1090 | Q3TUX3   | Proteasome subunit alpha type OS=Mus n       | 8 | 5  |

|      |          |                                           |   |    |
|------|----------|-------------------------------------------|---|----|
| 1135 | Q3U0E8   | GRB2-related adaptor protein 2 OS=Mus     | 8 | 5  |
| 1546 | Q58E35   | 60S acidic ribosomal protein P1 OS=Mus    | 8 | 5  |
| 1614 | Q5SWR1   | AP complex subunit beta OS=Mus muscu      | 8 | 5  |
| 1888 | Q811D0-2 | Isoform 2 of Disks large homolog 1 OS=M   | 8 | 5  |
| 1889 | Q811D0-3 | Isoform 3 of Disks large homolog 1 OS=M   | 8 | 5  |
| 2394 | Q9DBG3   | AP-2 complex subunit beta OS=Mus musc     | 8 | 5  |
| 2559 | Q9Z2U1   | Proteasome subunit alpha type-5 OS=Mus    | 8 | 5  |
| 588  | P28063   | Proteasome subunit beta type-8 OS=Mus     | 8 | 4  |
| 1327 | Q3UIG8   | Putative uncharacterized protein OS=Mus   | 8 | 4  |
| 1404 | Q3US32   | Putative uncharacterized protein OS=Mus   | 8 | 4  |
| 1854 | Q80SZ7   | Guanine nucleotide-binding protein G(I)/C | 8 | 4  |
| 2002 | Q8BYC6   | Serine/threonine-protein kinase TAO3 OS   | 8 | 4  |
| 87   | B1ATC0   | Transmembrane channel-like protein OS=    | 8 | 3  |
| 1364 | Q3ULG4   | Putative uncharacterized protein OS=Mus   | 8 | 3  |
| 1730 | Q6A0A3   | MKIAA0209 protein (Fragment) OS=Mus       | 8 | 3  |
| 1809 | Q6ZWY8   | Thymosin beta-10 OS=Mus musculus GN       | 8 | 3  |
| 2036 | Q8C3J5   | Dedicator of cytokinesis protein 2 OS=M   | 8 | 3  |
| 519  | P14152   | Malate dehydrogenase, cytoplasmic OS=M    | 8 | 2  |
| 805  | P86176   | T-cell immunoreceptor with Ig and ITIM    | 8 | 0  |
| 824  | P99026   | Proteasome subunit beta type-4 OS=Mus     | 8 | 0  |
| 1974 | Q8BTU5   | Proteasome subunit alpha type OS=Mus n    | 8 | 0  |
| 2509 | Q9R1P4   | Proteasome subunit alpha type-1 OS=Mus    | 8 | 0  |
| 95   | B1AZ14   | Cordon-bleu protein-like 1 OS=Mus musc    | 8 | 0  |
| 96   | B1AZ15   | Cordon-bleu protein-like 1 OS=Mus musc    | 8 | 0  |
| 1428 | Q3UXP2   | Putative uncharacterized protein OS=Mus   | 7 | 11 |
| 1593 | Q5RJV4   | Phosphoglucomutase 2 OS=Mus musculu       | 7 | 11 |
| 1720 | Q66JR7   | Pgm2 protein (Fragment) OS=Mus muscu      | 7 | 11 |
| 1837 | Q7TNU0   | Pgm2 protein (Fragment) OS=Mus muscu      | 7 | 11 |
| 2355 | Q9D0F9   | Phosphoglucomutase-1 OS=Mus musculu       | 7 | 11 |
| 1243 | Q3UA53   | Putative uncharacterized protein OS=Mus   | 7 | 10 |
| 1471 | Q4FK49   | Inorganic pyrophosphatase OS=Mus musc     | 7 | 10 |
| 2000 | Q8BY89   | Choline transporter-like protein 2 OS=M   | 7 | 10 |
| 431  | O70251   | Elongation factor 1-beta OS=Mus muscul    | 7 | 9  |
| 645  | P43276   | Histone H1.5 OS=Mus musculus GN=His       | 7 | 9  |
| 773  | P63321   | Ras-related protein Ral-A OS=Mus muscu    | 7 | 9  |
| 874  | Q1WWK3   | Hist1h1b protein (Fragment) OS=Mus mu     | 7 | 9  |
| 2323 | Q9CXY0   | Putative uncharacterized protein OS=Mus   | 7 | 9  |
| 183  | D3Z5I1   | Zinc finger CCCH-type antiviral protein 1 | 7 | 8  |
| 233  | E9Q414   | Apolipoprotein B-100 OS=Mus musculus      | 7 | 8  |
| 715  | P61255   | 60S ribosomal protein L26 OS=Mus musc     | 7 | 8  |

|      |          |                                           |   |   |
|------|----------|-------------------------------------------|---|---|
| 1118 | Q3TXS7   | 26S proteasome non-ATPase regulatory su   | 7 | 8 |
| 260  | E9QB02   | Methionine--tRNA ligase, cytoplasmic O    | 7 | 7 |
| 696  | P58069   | Ras GTPase-activating protein 2 OS=Mus    | 7 | 7 |
| 747  | P62855   | 40S ribosomal protein S26 OS=Mus musc     | 7 | 7 |
| 753  | P62918   | 60S ribosomal protein L8 OS=Mus muscu     | 7 | 7 |
| 813  | P97384   | Annexin A11 OS=Mus musculus GN=An         | 7 | 7 |
| 818  | P97822   | Acidic leucine-rich nuclear phosphoprotei | 7 | 7 |
| 1110 | Q3TX26   | Putative uncharacterized protein OS=Mus   | 7 | 7 |
| 1504 | Q542I9   | 26S protease regulatory subunit 4 OS=M    | 7 | 7 |
| 1565 | Q5EBQ6   | 60S ribosomal protein L9 OS=Mus muscu     | 7 | 7 |
| 1580 | Q5M9L7   | 40S ribosomal protein S17 OS=Mus musc     | 7 | 7 |
| 1655 | Q61081   | Hsp90 co-chaperone Cdc37 OS=Mus mus       | 7 | 7 |
| 1724 | Q68FL6   | Methionine--tRNA ligase, cytoplasmic O    | 7 | 7 |
| 1968 | Q8BT90   | Putative uncharacterized protein (Fragmer | 7 | 7 |
| 2099 | Q8CIN4   | Serine/threonine-protein kinase PAK 2 O   | 7 | 7 |
| 282  | F5BFH0   | C-type lectin domain family 2 member D    | 7 | 6 |
| 463  | P04370   | Myelin basic protein OS=Mus musculus C    | 7 | 6 |
| 633  | P41105   | 60S ribosomal protein L28 OS=Mus musc     | 7 | 6 |
| 751  | P62889   | 60S ribosomal protein L30 OS=Mus musc     | 7 | 6 |
| 846  | Q06138   | Calcium-binding protein 39 OS=Mus mus     | 7 | 6 |
| 1003 | Q3TJ43   | Putative uncharacterized protein OS=Mus   | 7 | 6 |
| 1025 | Q3TKU6   | Putative uncharacterized protein OS=Mus   | 7 | 6 |
| 1071 | Q3TRJ1   | Vacuolar protein sorting 35, isoform CRA  | 7 | 6 |
| 1554 | Q5D096   | Myelin basic protein OS=Mus musculus C    | 7 | 6 |
| 1584 | Q5M9N5   | Ribosomal protein L28 OS=Mus musculu      | 7 | 6 |
| 2160 | Q8VE70   | Programmed cell death protein 10 OS=M     | 7 | 6 |
| 2472 | Q9QUM4-2 | Isoform Short of Signaling lymphocytic a  | 7 | 6 |
| 9    | A1L333   | DEAD (Asp-Glu-Ala-Asp) box polypeptic     | 7 | 5 |
| 238  | E9Q5A0   | 60S ribosomal protein L13a OS=Mus mus     | 7 | 5 |
| 437  | O70569   | Ribosomal protein S14 OS=Mus musculu:     | 7 | 5 |
| 691  | P56399   | Ubiquitin carboxyl-terminal hydrolase 5 C | 7 | 5 |
| 727  | P62264   | 40S ribosomal protein S14 OS=Mus musc     | 7 | 5 |
| 1167 | Q3U4W8   | Ubiquitin carboxyl-terminal hydrolase 5 C | 7 | 5 |
| 1441 | Q3V0Z8   | Putative uncharacterized protein (Fragmer | 7 | 5 |
| 1618 | Q5U222   | Ddx5 protein (Fragment) OS=Mus muscu      | 7 | 5 |
| 1673 | Q61656   | Probable ATP-dependent RNA helicase D     | 7 | 5 |
| 1766 | Q6P5F9   | Exportin-1 OS=Mus musculus GN=Xpo1        | 7 | 5 |
| 1972 | Q8BTS0   | DEAD (Asp-Glu-Ala-Asp) box polypeptic     | 7 | 5 |
| 2538 | Q9Z0H4-4 | Isoform 4 of CUGBP Elav-like family me    | 7 | 5 |
| 2539 | Q9Z0H4-5 | Isoform 5 of CUGBP Elav-like family me    | 7 | 5 |

|      |          |                                           |   |    |
|------|----------|-------------------------------------------|---|----|
| 2540 | Q9Z0H4-7 | Isoform 7 of CUGBP Elav-like family me    | 7 | 5  |
| 55   | A2BE93   | Protein SET (Fragment) OS=Mus musculi     | 7 | 4  |
| 86   | B1ATB3   | Transmembrane channel-like protein OS=    | 7 | 4  |
| 118  | B2RUK2   | ErbB2 interacting protein OS=Mus muscu    | 7 | 4  |
| 499  | P11157   | Ribonucleoside-diphosphate reductase su   | 7 | 4  |
| 580  | P26883   | Peptidyl-prolyl cis-trans isomerase FKBP  | 7 | 4  |
| 590  | P28474   | Alcohol dehydrogenase class-3 OS=Mus 1    | 7 | 4  |
| 817  | P97814   | Proline-serine-threonine phosphatase-inte | 7 | 4  |
| 886  | Q3T9S3   | SET translocation OS=Mus musculus GN=     | 7 | 4  |
| 972  | Q3THV8   | Putative uncharacterized protein OS=Mus   | 7 | 4  |
| 2161 | Q8VEK0   | Cell cycle control protein 50A OS=Mus n   | 7 | 4  |
| 2360 | Q9D1A2   | Cytosolic non-specific dipeptidase OS=M   | 7 | 4  |
| 366  | J3QNG0   | MCG15755 OS=Mus musculus GN=Gm5           | 7 | 3  |
| 419  | O54890   | Integrin beta-3 OS=Mus musculus GN=It     | 7 | 3  |
| 531  | P16460   | Argininosuccinate synthase OS=Mus mus     | 7 | 3  |
| 1141 | Q3U1F9   | Phosphoprotein associated with glycosphi  | 7 | 3  |
| 1304 | Q3UEJ7   | Putative uncharacterized protein OS=Mus   | 7 | 3  |
| 1484 | Q4VA93   | Protein kinase C OS=Mus musculus GN=      | 7 | 3  |
| 1527 | Q545V8   | Casein kinase II subunit alpha' OS=Mus n  | 7 | 3  |
| 1624 | Q5Y5T1   | Probable palmitoyltransferase ZDHHC20     | 7 | 3  |
| 1625 | Q5Y5T1-2 | Isoform 2 of Probable palmitoyltransferas | 7 | 3  |
| 1776 | Q6P9R2   | Serine/threonine-protein kinase OSR1 OS   | 7 | 3  |
| 1796 | Q6ZPX7   | MKIAA1101 protein (Fragment) OS=Mus       | 7 | 3  |
| 18   | A2A6U3   | Septin-9 OS=Mus musculus GN=Sept9 Pl      | 7 | 2  |
| 1862 | Q80UG5   | Septin-9 OS=Mus musculus GN=Sept9 Pl      | 7 | 2  |
| 1000 | Q3TJ01   | tRNA-splicing ligase RtcB homolog OS=]    | 7 | 0  |
| 644  | P43275   | Histone H1.1 OS=Mus musculus GN=His       | 7 | 0  |
| 1376 | Q3UM23   | Putative uncharacterized protein OS=Mus   | 6 | 17 |
| 881  | Q3T9A2   | SLAM family member 7 OS=Mus muscul        | 6 | 12 |
| 1912 | Q8BHK6   | SLAM family member 7 OS=Mus muscul        | 6 | 12 |
| 2385 | Q9D8B3   | Charged multivesicular body protein 4b O  | 6 | 10 |
| 93   | B1AWE0   | Clathrin light chain A OS=Mus musculus    | 6 | 9  |
| 968  | Q3THP1   | Putative uncharacterized protein OS=Mus   | 6 | 9  |
| 971  | Q3THU7   | Putative uncharacterized protein OS=Mus   | 6 | 9  |
| 1285 | Q3UDF3   | Putative uncharacterized protein OS=Mus   | 6 | 9  |
| 1672 | Q61655   | ATP-dependent RNA helicase DDX19A C       | 6 | 9  |
| 1751 | Q6NXZ0   | Dipeptidylpeptidase 3 OS=Mus musculus     | 6 | 9  |
| 1786 | Q6PFA2   | Clathrin light chain A OS=Mus musculus    | 6 | 9  |
| 1979 | Q8BU29   | Dipeptidylpeptidase 3, isoform CRA_c O'   | 6 | 9  |
| 2245 | Q99KK7   | Dipeptidyl peptidase 3 OS=Mus musculus    | 6 | 9  |



|      |        |                                             |   |   |
|------|--------|---------------------------------------------|---|---|
| 1552 | Q5BLJ9 | 60S ribosomal protein L27 OS=Mus musc       | 6 | 8 |
| 1950 | Q8BPF4 | Putative uncharacterized protein OS=Mus     | 6 | 8 |
| 2325 | Q9CY06 | Putative uncharacterized protein OS=Mus     | 6 | 8 |
| 2476 | Q9QWJ3 | Alpha-1-globin (Fragment) OS=Mus musc       | 6 | 8 |
| 15   | A2A6A6 | Inducible T-cell co-stimulator OS=Mus m     | 6 | 7 |
| 16   | A2A6A7 | Inducible T-cell co-stimulator OS=Mus m     | 6 | 7 |
| 243  | E9Q616 | Protein Ahnak OS=Mus musculus GN=Al         | 6 | 7 |
| 447  | O88952 | Protein lin-7 homolog C OS=Mus muscul       | 6 | 7 |
| 460  | P01887 | Beta-2-microglobulin OS=Mus musculus        | 6 | 7 |
| 466  | P05201 | Aspartate aminotransferase, cytoplasmic C   | 6 | 7 |
| 529  | P16045 | Galectin-1 OS=Mus musculus GN=Lgals1        | 6 | 7 |
| 770  | P63213 | Guanine nucleotide-binding protein G(I)/C   | 6 | 7 |
| 998  | Q3TIV6 | Lysine--tRNA ligase OS=Mus musculus C       | 6 | 7 |
| 1020 | Q3TK95 | Eukaryotic translation initiation factor 4E | 6 | 7 |
| 1084 | Q3TTY6 | Putative uncharacterized protein (Fragmer   | 6 | 7 |
| 1452 | Q3V3X2 | Putative uncharacterized protein OS=Mus     | 6 | 7 |
| 1575 | Q5M8R9 | Farnesyl diphosphate synthetase OS=Mus      | 6 | 7 |
| 1609 | Q5SUZ7 | Inducible T-cell co-stimulator OS=Mus m     | 6 | 7 |
| 1610 | Q5SUZ8 | Inducible T-cell costimulator OS=Mus m      | 6 | 7 |
| 1853 | Q80SW1 | Putative adenosylhomocysteinase 2 OS=M      | 6 | 7 |
| 2015 | Q8C1V4 | Lysine--tRNA ligase OS=Mus musculus C       | 6 | 7 |
| 2019 | Q8C292 | Lysine--tRNA ligase OS=Mus musculus C       | 6 | 7 |
| 2080 | Q8CFE6 | Sodium-coupled neutral amino acid transp    | 6 | 7 |
| 2210 | Q920E5 | Farnesyl pyrophosphate synthase OS=Mus      | 6 | 7 |
| 2473 | Q9QUM9 | Proteasome subunit alpha type-6 OS=Mus      | 6 | 7 |
| 2488 | Q9QZE5 | Coatomer subunit gamma-1 OS=Mus mus         | 6 | 7 |
| 395  | O09167 | 60S ribosomal protein L21 OS=Mus musc       | 6 | 6 |
| 493  | P10639 | Thioredoxin OS=Mus musculus GN=Txn          | 6 | 6 |
| 612  | P34884 | Macrophage migration inhibitory factor O    | 6 | 6 |
| 634  | P41241 | Tyrosine-protein kinase CSK OS=Mus m        | 6 | 6 |
| 746  | P62852 | 40S ribosomal protein S25 OS=Mus musc       | 6 | 6 |
| 1416 | Q3UVH2 | Tyrosine-protein kinase OS=Mus muscul       | 6 | 6 |
| 1474 | Q4FZE6 | 40S ribosomal protein S7 OS=Mus muscu       | 6 | 6 |
| 1641 | Q60770 | Syntaxin-binding protein 3 OS=Mus musc      | 6 | 6 |
| 1765 | Q6P5F7 | Protein tweety homolog 3 OS=Mus musc        | 6 | 6 |
| 2212 | Q921F2 | TAR DNA-binding protein 43 OS=Mus r         | 6 | 6 |
| 2285 | Q9CQM8 | 60S ribosomal protein L21 OS=Mus musc       | 6 | 6 |
| 2330 | Q9CYG7 | Mitochondrial import receptor subunit TO    | 6 | 6 |
| 2424 | Q9ERL7 | Glia maturation factor gamma OS=Mus r       | 6 | 6 |
| 71   | A7VJ98 | Glia maturation factor beta OS=Mus musc     | 6 | 5 |

|      |            |                                             |   |   |
|------|------------|---------------------------------------------|---|---|
| 172  | D3YZ61     | Complement C1q tumor necrosis factor-re     | 6 | 5 |
| 1089 | Q3TUN5     | Putative uncharacterized protein OS=Mus     | 6 | 5 |
| 1173 | Q3U561     | Ribosomal protein OS=Mus musculus GN        | 6 | 5 |
| 1874 | Q80X87     | Glia maturation factor, beta OS=Mus mus     | 6 | 5 |
| 1985 | Q8BVF6     | Putative uncharacterized protein OS=Mus     | 6 | 5 |
| 2102 | Q8K094     | Nectin-2 OS=Mus musculus GN=Pvr PE=         | 6 | 5 |
| 2108 | Q8K1I7     | WAS/WASL-interacting protein family m       | 6 | 5 |
| 2117 | Q8K2Y3     | Protein eva-1 homolog B OS=Mus muscu        | 6 | 5 |
| 2128 | Q8R010     | Aminoacyl tRNA synthase complex-inter       | 6 | 5 |
| 2186 | Q91WP1     | Cd155 OS=Mus musculus GN=Pvr PE=2           | 6 | 5 |
| 2283 | Q9CQI3     | Glia maturation factor beta OS=Mus musc     | 6 | 5 |
| 2426 | Q9ES30     | Complement C1q tumor necrosis factor-re     | 6 | 5 |
| 501  | P11440     | Cyclin-dependent kinase 1 OS=Mus musc       | 6 | 4 |
| 716  | P61290     | Proteasome activator complex subunit 3 C    | 6 | 4 |
| 726  | P62196     | 26S protease regulatory subunit 8 OS=MU     | 6 | 4 |
| 730  | P62301     | 40S ribosomal protein S13 OS=Mus musc       | 6 | 4 |
| 786  | P70315     | Wiskott-Aldrich syndrome protein homol      | 6 | 4 |
| 918  | Q3TDD8     | Putative uncharacterized protein OS=Mus     | 6 | 4 |
| 935  | Q3TFA9     | Putative uncharacterized protein OS=Mus     | 6 | 4 |
| 1078 | Q3TSY9     | Putative uncharacterized protein OS=Mus     | 6 | 4 |
| 1108 | Q3TWZ3     | Putative uncharacterized protein OS=Mus     | 6 | 4 |
| 1316 | Q3UGC0     | Putative uncharacterized protein OS=Mus     | 6 | 4 |
| 1903 | Q8BGD9     | Eukaryotic translation initiation factor 4B | 6 | 4 |
| 2183 | Q91W53     | Golgin subfamily A member 7 OS=Mus n        | 6 | 4 |
| 2239 | Q99JW7     | Cdc2a protein (Fragment) OS=Mus muscu       | 6 | 4 |
| 2438 | Q9JHJ0     | Tropomodulin-3 OS=Mus musculus GN=          | 6 | 4 |
| 2490 | Q9QZI9     | Serine incorporator 3 OS=Mus musculus (     | 6 | 4 |
| 2500 | Q9R0P5     | Destrin OS=Mus musculus GN=Dstn PE=         | 6 | 4 |
| 1    | A0A0G2JG10 | Pre-mRNA-splicing factor ATP-dependen       | 6 | 3 |
| 167  | D3YW52     | Alpha-2-macroglobulin OS=Mus musculu        | 6 | 3 |
| 313  | F8WIV5     | Dynamamin-2 OS=Mus musculus GN=Dnm.         | 6 | 3 |
| 481  | P08249     | Malate dehydrogenase, mitochondrial OS=     | 6 | 3 |
| 624  | P39054     | Dynamamin-2 OS=Mus musculus GN=Dnm.         | 6 | 3 |
| 625  | P39054-2   | Isoform 2 of Dynamamin-2 OS=Mus muscul      | 6 | 3 |
| 632  | P40240     | CD9 antigen OS=Mus musculus GN=Cd9          | 6 | 3 |
| 888  | Q3T9X3     | Dynamamin-2 OS=Mus musculus GN=Dnm.         | 6 | 3 |
| 937  | Q3TFE5     | Putative uncharacterized protein OS=Mus     | 6 | 3 |
| 1040 | Q3TLX1     | Putative uncharacterized protein OS=Mus     | 6 | 3 |
| 1297 | Q3UDX4     | Putative uncharacterized protein (Fragmer   | 6 | 3 |
| 1343 | Q3UJS6     | Putative uncharacterized protein OS=Mus     | 6 | 3 |

|      |        |                                            |   |    |
|------|--------|--------------------------------------------|---|----|
| 1354 | Q3UKJ6 | DEAH (Asp-Glu-Ala-His) box polypeptid      | 6 | 3  |
| 1459 | Q497W9 | DEAH (Asp-Glu-Ala-His) box polypeptid      | 6 | 3  |
| 1659 | Q61171 | Peroxiredoxin-2 OS=Mus musculus GN=]       | 6 | 3  |
| 1686 | Q61838 | Alpha-2-macroglobulin OS=Mus musculu       | 6 | 3  |
| 2032 | Q8C2Q0 | Putative uncharacterized protein OS=Mus    | 6 | 3  |
| 2049 | Q8C6F4 | Putative uncharacterized protein OS=Mus    | 6 | 3  |
| 2051 | Q8C708 | Transmembrane protein C16orf54 homolc      | 6 | 3  |
| 2059 | Q8CAG6 | Pleckstrin OS=Mus musculus GN=Plek P.      | 6 | 3  |
| 2199 | Q91YR1 | Twinfilin-1 OS=Mus musculus GN=Twf1        | 6 | 3  |
| 2249 | Q99KQ4 | Nicotinamide phosphoribosyltransferase C   | 6 | 3  |
| 2280 | Q9CQD1 | Ras-related protein Rab-5A OS=Mus mus      | 6 | 3  |
| 2380 | Q9D7F5 | Putative uncharacterized protein OS=Mus    | 6 | 3  |
| 2439 | Q9JHK5 | Pleckstrin OS=Mus musculus GN=Plek P.      | 6 | 3  |
| 202  | E9PV41 | Protein diaphanous homolog 1 OS=Mus n      | 6 | 2  |
| 212  | E9PXV7 | Protein diaphanous homolog 1 OS=Mus n      | 6 | 2  |
| 387  | O08808 | Protein diaphanous homolog 1 OS=Mus n      | 6 | 2  |
| 516  | P14115 | 60S ribosomal protein L27a OS=Mus mus      | 6 | 2  |
| 893  | Q3TA88 | Putative uncharacterized protein OS=Mus    | 6 | 2  |
| 965  | Q3THK7 | GMP synthase [glutamine-hydrolyzing] O     | 6 | 2  |
| 1549 | Q58EV4 | Proteasome subunit alpha type OS=Mus n     | 6 | 2  |
| 1558 | Q5DTQ4 | MKIAA4062 protein (Fragment) OS=Mus:       | 6 | 2  |
| 1598 | Q5RL55 | ATP-binding cassette, sub-family F (GCN    | 6 | 2  |
| 1760 | Q6P542 | ATP-binding cassette sub-family F memb     | 6 | 2  |
| 1774 | Q6P9N1 | Hyccin OS=Mus musculus GN=Fam126a          | 6 | 2  |
| 2146 | Q8R550 | SH3 domain-containing kinase-binding pr    | 6 | 2  |
| 2410 | Q9DCD8 | Proteasome subunit alpha type OS=Mus n     | 6 | 2  |
| 1290 | Q3UDI8 | DNA helicase OS=Mus musculus GN=M          | 6 | 0  |
| 1443 | Q3V122 | DNA helicase OS=Mus musculus GN=M          | 6 | 0  |
| 1687 | Q61881 | DNA replication licensing factor MCM7 C    | 6 | 0  |
| 408  | O35601 | FYN-binding protein OS=Mus musculus C      | 6 | 0  |
| 435  | O70400 | PDZ and LIM domain protein 1 OS=Mus        | 6 | 0  |
| 390  | O08917 | Flotillin-1 OS=Mus musculus GN=Flot1 I     | 5 | 13 |
| 115  | B2RUC7 | Serine-threonine kinase receptor-associate | 5 | 11 |
| 674  | P50431 | Serine hydroxymethyltransferase, cytosoli  | 5 | 10 |
| 2068 | Q8CCG5 | Putative uncharacterized protein OS=Mus    | 5 | 10 |
| 2309 | Q9CWR5 | Serine hydroxymethyltransferase OS=Mus:    | 5 | 10 |
| 2447 | Q9JIW9 | Ras-related protein Ral-B OS=Mus muscu     | 5 | 10 |
| 735  | P62482 | Voltage-gated potassium channel subunit    | 5 | 8  |
| 815  | P97429 | Annexin A4 OS=Mus musculus GN=Anx          | 5 | 8  |
| 1395 | Q3UPV6 | Voltage-gated potassium channel subunit    | 5 | 8  |

|      |            |                                               |   |   |
|------|------------|-----------------------------------------------|---|---|
| 1829 | Q7TMN7     | Annexin OS=Mus musculus GN=Anxa4 F            | 5 | 8 |
| 2172 | Q91V55     | 40S ribosomal protein S5 OS=Mus muscu         | 5 | 8 |
| 1576 | Q5M9K7     | 40S ribosomal protein S10 OS=Mus musc         | 5 | 7 |
|      | 57 A2RS22  | Coronin OS=Mus musculus GN=Coro1b l           | 5 | 6 |
| 530  | P16125     | L-lactate dehydrogenase B chain OS=Mus        | 5 | 6 |
| 551  | P19157     | Glutathione S-transferase P 1 OS=Mus m        | 5 | 6 |
| 637  | P42225     | Signal transducer and activator of transcri   | 5 | 6 |
| 1317 | Q3UGH8     | Putative uncharacterized protein (Fragmer     | 5 | 6 |
| 1525 | Q545P4     | Tumor necrosis factor receptor superfamil     | 5 | 6 |
| 1907 | Q8BGW0     | Protein THEMIS OS=Mus musculus GN=            | 5 | 6 |
|      | 570 P25206 | DNA replication licensing factor MCM3 C       | 5 | 5 |
|      | 783 P70195 | Proteasome subunit beta type-7 OS=Mus 1       | 5 | 5 |
|      | 981 Q3TI69 | DNA dC->dU-editing enzyme APOBEC-             | 5 | 5 |
| 1219 | Q3U8R9     | Putative uncharacterized protein OS=Mus       | 5 | 5 |
| 1363 | Q3ULD6     | DNA helicase OS=Mus musculus GN=Mu            | 5 | 5 |
| 1384 | Q3UNH3     | Putative uncharacterized protein (Fragmer     | 5 | 5 |
| 1772 | Q6P9J9     | Anoctamin-6 OS=Mus musculus GN=Ano            | 5 | 5 |
| 1797 | Q6ZQ38     | Cullin-associated NEDD8-dissociated pro       | 5 | 5 |
| 2074 | Q8CDN6     | Thioredoxin-like protein 1 OS=Mus musc        | 5 | 5 |
| 2237 | Q99JI4     | 26S proteasome non-ATPase regulatory si       | 5 | 5 |
| 2241 | Q99JX4     | Eukaryotic translation initiation factor 3 si | 5 | 5 |
| 2392 | Q9DB05     | Alpha-soluble NSF attachment protein OS       | 5 | 5 |
| 2419 | Q9EPU0     | Regulator of nonsense transcripts 1 OS=M      | 5 | 5 |
| 2518 | Q9WTR1     | Transient receptor potential cation channe    | 5 | 5 |
|      | 88 B1ATD2  | Lymphocyte cytosolic protein 2 OS=Mus         | 5 | 4 |
|      | 159 C6EQJ5 | ASL1/3110003A17Rik fusion protein OS-         | 5 | 4 |
|      | 273 E9QMV2 | Costars family protein ABRACL OS=Mus          | 5 | 4 |
|      | 286 F6QX71 | Lck-interacting transmembrane adapter 1       | 5 | 4 |
|      | 309 F8WHL2 | Coatomer subunit alpha OS=Mus muscul          | 5 | 4 |
|      | 393 O09061 | Proteasome subunit beta type-1 OS=Mus 1       | 5 | 4 |
|      | 422 O54988 | STE20-like serine/threonine-protein kinas     | 5 | 4 |
|      | 523 P14685 | 26S proteasome non-ATPase regulatory si       | 5 | 4 |
|      | 536 P17426 | AP-2 complex subunit alpha-1 OS=Mus n         | 5 | 4 |
|      | 557 P20934 | Protein EVI2A OS=Mus musculus GN=E            | 5 | 4 |
|      | 728 P62267 | 40S ribosomal protein S23 OS=Mus musc         | 5 | 4 |
|      | 795 P70670 | Nascent polypeptide-associated complex s      | 5 | 4 |
|      | 904 Q3TBB7 | Putative uncharacterized protein OS=Mus       | 5 | 4 |
|      | 995 Q3TIS3 | Putative uncharacterized protein OS=Mus       | 5 | 4 |
| 1126 | Q3TYS4     | Putative uncharacterized protein OS=Mus       | 5 | 4 |
| 1352 | Q3UKB4     | Putative uncharacterized protein OS=Mus       | 5 | 4 |

|      |          |                                              |   |   |
|------|----------|----------------------------------------------|---|---|
| 1370 | Q3ULL5   | Eif2s2 protein OS=Mus musculus GN=Ei         | 5 | 4 |
| 1456 | Q497E1   | Ribosomal protein S23 OS=Mus musculu         | 5 | 4 |
| 1468 | Q4FJZ4   | Wars protein OS=Mus musculus GN=Wa           | 5 | 4 |
| 1642 | Q60787   | Lymphocyte cytosolic protein 2 OS=Mus        | 5 | 4 |
| 1679 | Q61739-2 | Isoform Alpha-6X1A of Integrin alpha-6       | 5 | 4 |
| 1705 | Q63ZW9   | Copa protein (Fragment) OS=Mus muscul        | 5 | 4 |
| 1759 | Q6P4T2   | U5 small nuclear ribonucleoprotein 200 k     | 5 | 4 |
| 1764 | Q6P5F6   | Zinc transporter ZIP10 OS=Mus musculus       | 5 | 4 |
| 1813 | Q71FD5   | E3 ubiquitin-protein ligase ZNRF2 OS=M       | 5 | 4 |
| 1926 | Q8BK46   | Putative uncharacterized protein OS=Mus      | 5 | 4 |
| 1969 | Q8BTF0   | Coatomer subunit alpha OS=Mus muscul         | 5 | 4 |
| 2096 | Q8CIE6   | Coatomer subunit alpha OS=Mus muscul         | 5 | 4 |
| 2375 | Q9D662   | Protein transport protein Sec23B OS=Mus      | 5 | 4 |
| 2487 | Q9QZD9   | Eukaryotic translation initiation factor 3 s | 5 | 4 |
| 36   | A2AI08   | Taperin OS=Mus musculus GN=Tprn PE-          | 5 | 3 |
| 121  | B2RWW6   | GCN1 general control of amino-acid syntl     | 5 | 3 |
| 122  | B2RX66   | MCG124812 OS=Mus musculus GN=Tac             | 5 | 3 |
| 131  | B7ZCP4   | Copine-1 OS=Mus musculus GN=Cpne1            | 5 | 3 |
| 203  | E9PVA8   | Protein Gcn111 OS=Mus musculus GN=G          | 5 | 3 |
| 232  | E9Q3X0   | Major vault protein OS=Mus musculus Gl       | 5 | 3 |
| 269  | E9QM38   | Solute carrier family 12 member 2 OS=M       | 5 | 3 |
| 344  | G5E866   | Splicing factor 3B subunit 1 OS=Mus mu       | 5 | 3 |
| 974  | Q3THX5   | Putative uncharacterized protein OS=Mus      | 5 | 3 |
| 1323 | Q3UHQ5   | Putative uncharacterized protein OS=Mus      | 5 | 3 |
| 1359 | Q3UL30   | Putative uncharacterized protein OS=Mus      | 5 | 3 |
| 1406 | Q3USZ5   | Putative uncharacterized protein (Fragmer    | 5 | 3 |
| 1485 | Q4VAA2   | Protein CDV3 OS=Mus musculus GN=Cc           | 5 | 3 |
| 1635 | Q60692   | Proteasome subunit beta type-6 OS=Mus        | 5 | 3 |
| 1690 | Q62000   | Mimecan OS=Mus musculus GN=Ogn PE            | 5 | 3 |
| 2011 | Q8C166   | Copine-1 OS=Mus musculus GN=Cpne1            | 5 | 3 |
| 2034 | Q8C2S9   | Putative uncharacterized protein OS=Mus      | 5 | 3 |
| 2084 | Q8CG48   | Structural maintenance of chromosomes p      | 5 | 3 |
| 2115 | Q8K2P7   | Sodium-coupled neutral amino acid transp     | 5 | 3 |
| 2263 | Q99MI6   | GTPase IMAP family member 3 OS=Mus           | 5 | 3 |
| 2266 | Q99NB9   | Splicing factor 3B subunit 1 OS=Mus mu       | 5 | 3 |
| 2277 | Q9CQ65   | S-methyl-5'-thioadenosine phosphorylase      | 5 | 3 |
| 2296 | Q9CR26   | Vacuolar protein sorting-associated protei   | 5 | 3 |
| 2337 | Q9CZ69   | CKLF-like MARVEL transmembrane dor           | 5 | 3 |
| 2353 | Q9D0B6   | Protein PBDC1 OS=Mus musculus GN=F           | 5 | 3 |
| 2390 | Q9DAS9   | Guanine nucleotide-binding protein G(I)/C    | 5 | 3 |

|      |        |                                               |   |   |
|------|--------|-----------------------------------------------|---|---|
| 2420 | Q9EQK5 | Major vault protein OS=Mus musculus GI        | 5 | 3 |
| 2551 | Q9Z1N5 | Spliceosome RNA helicase Ddx39b OS=M          | 5 | 3 |
| 398  | O35235 | Tumor necrosis factor ligand superfamily      | 5 | 2 |
| 489  | P0C0A3 | Charged multivesicular body protein 6 OS      | 5 | 2 |
| 867  | Q18PJ2 | Ly108 OS=Mus musculus GN=Slamf6 PE            | 5 | 2 |
| 1228 | Q3U9A8 | SH3 domain-binding glutamic acid-rich-li      | 5 | 2 |
| 1326 | Q3UIG0 | Eukaryotic translation initiation factor 3 si | 5 | 2 |
| 1415 | Q3UV17 | Keratin, type II cytoskeletal 2 oral OS=M     | 5 | 2 |
| 1514 | Q543N3 | LIM and SH3 domain protein 1 OS=Mus :         | 5 | 2 |
| 2136 | Q8R1G6 | PDZ and LIM domain protein 2 OS=Mus           | 5 | 2 |
| 2289 | Q9CQT1 | Methylthioribose-1-phosphate isomerase (      | 5 | 2 |
| 2314 | Q9CX34 | Protein SGT1 homolog OS=Mus musculu           | 5 | 2 |
| 2318 | Q9CXP8 | Guanine nucleotide-binding protein G(I)/C     | 5 | 2 |
| 2437 | Q9ET39 | SLAM family member 6 OS=Mus muscul            | 5 | 2 |
| 2452 | Q9JJU8 | SH3 domain-binding glutamic acid-rich-li      | 5 | 2 |
| 2524 | Q9WUP7 | Ubiquitin carboxyl-terminal hydrolase iso     | 5 | 2 |
| 1115 | Q3TXE5 | Putative uncharacterized protein OS=Mus       | 5 | 0 |
| 1372 | Q3ULT8 | Putative uncharacterized protein OS=Mus       | 5 | 0 |
| 1414 | Q3UV15 | Putative uncharacterized protein OS=Mus       | 5 | 0 |
| 1479 | Q4U108 | NF-kB2 splice variant 1 OS=Mus musculi        | 5 | 0 |
| 1606 | Q5SUC3 | Calnexin OS=Mus musculus GN=Canx Pl           | 5 | 0 |
| 2253 | Q99LE6 | ATP-binding cassette sub-family F memb        | 5 | 0 |
| 2516 | Q9WTK5 | Nuclear factor NF-kappa-B p100 subunit t      | 5 | 0 |
| 2550 | Q9Z1F9 | SUMO-activating enzyme subunit 2 OS=M         | 5 | 0 |
| 4    | A0N8K9 | T3 delta-chain (Fragment) OS=Mus musc         | 5 | 0 |
| 684  | P54728 | UV excision repair protein RAD23 homol        | 5 | 0 |
| 736  | P62484 | Abl interactor 2 OS=Mus musculus GN=/         | 5 | 0 |
| 908  | Q3TCJ8 | Coiled-coil domain-containing protein 69      | 5 | 0 |
| 1131 | Q3U041 | Putative uncharacterized protein OS=Mus       | 5 | 0 |
| 1137 | Q3U0K0 | Putative uncharacterized protein OS=Mus       | 5 | 0 |
| 1165 | Q3U4T1 | CD3 antigen delta polypeptide OS=Mus n        | 5 | 0 |
| 1174 | Q3U572 | Putative uncharacterized protein OS=Mus       | 5 | 0 |
| 1398 | Q3UQN3 | Putative uncharacterized protein OS=Mus       | 5 | 0 |
| 1671 | Q61635 | GTP-binding protein OS=Mus musculus C         | 5 | 0 |
| 1707 | Q64151 | Semaphorin-4C OS=Mus musculus GN=ξ            | 5 | 0 |
| 1735 | Q6AXD2 | Abi2 protein OS=Mus musculus GN=Abi:          | 5 | 0 |
| 1737 | Q6AXH6 | Abi2 protein OS=Mus musculus GN=Abi:          | 5 | 0 |
| 1767 | Q6P5P1 | CD3 antigen, delta polypeptide OS=Mus 1       | 5 | 0 |
| 563  | P23298 | Protein kinase C eta type OS=Mus muscu        | 4 | 8 |
| 1356 | Q3UKY1 | Protein kinase C eta type OS=Mus muscu        | 4 | 8 |

|      |        |                                               |   |   |
|------|--------|-----------------------------------------------|---|---|
| 1649 | Q60972 | Histone-binding protein RBBP4 OS=Mus          | 4 | 7 |
| 2166 | Q8VIJ6 | Splicing factor, proline- and glutamine-ric   | 4 | 7 |
| 2573 | Z4YLB7 | Neuroplastin OS=Mus musculus GN=Npt           | 4 | 7 |
| 399  | O35295 | Transcriptional activator protein Pur-beta    | 4 | 6 |
| 411  | O35685 | Nuclear migration protein nudC OS=Mus         | 4 | 6 |
| 821  | P97855 | Ras GTPase-activating protein-binding pr      | 4 | 6 |
| 946  | Q3TGF2 | Protein FAM107B OS=Mus musculus GN            | 4 | 6 |
| 973  | Q3THW7 | Eukaryotic translation initiation factor 3 si | 4 | 6 |
| 988  | Q3TII2 | Eukaryotic translation initiation factor 3 si | 4 | 6 |
| 1480 | Q4V9X9 | Rpl23a protein (Fragment) OS=Mus musc         | 4 | 6 |
| 1540 | Q571F9 | MKIAA4115 protein (Fragment) OS=Mus           | 4 | 6 |
| 1578 | Q5M9L0 | Eukaryotic translation initiation factor 3 si | 4 | 6 |
| 1583 | Q5M9M5 | 60S ribosomal protein L23a OS=Mus musc        | 4 | 6 |
| 1876 | Q80XI4 | Phosphatidylinositol 5-phosphate 4-kinase     | 4 | 6 |
| 1976 | Q8BTX5 | Eukaryotic translation initiation factor 3 si | 4 | 6 |
| 2268 | Q99PV0 | Pre-mRNA-processing-splicing factor 8 C       | 4 | 6 |
| 2328 | Q9CY61 | 40S ribosomal protein S24 OS=Mus musc         | 4 | 6 |
| 503  | P11688 | Integrin alpha-5 OS=Mus musculus GN=I         | 4 | 5 |
| 649  | P46062 | Signal-induced proliferation-associated pr    | 4 | 5 |
| 785  | P70290 | 55 kDa erythrocyte membrane protein OS        | 4 | 5 |
| 1421 | Q3UW40 | Putative uncharacterized protein OS=Mus       | 4 | 5 |
| 1722 | Q684Q6 | Membrane protein, palmitoylated (Fragme       | 4 | 5 |
| 1881 | Q80YP5 | Integrin alpha 5 (Fibronectin receptor alpl   | 4 | 5 |
| 1947 | Q8BP67 | 60S ribosomal protein L24 OS=Mus musc         | 4 | 5 |
| 2501 | Q9R0Q6 | Actin-related protein 2/3 complex subunit     | 4 | 5 |
| 59   | A2RSB1 | Nucleosome assembly protein 1-like 4 OS       | 4 | 4 |
| 140  | B7ZNL2 | Nap114 protein OS=Mus musculus GN=N           | 4 | 4 |
| 164  | D3YTQ9 | 40S ribosomal protein S15 OS=Mus musc         | 4 | 4 |
| 324  | G3UYV7 | 40S ribosomal protein S28 (Fragment) OS       | 4 | 4 |
| 708  | P61089 | Ubiquitin-conjugating enzyme E2 N OS=]        | 4 | 4 |
| 748  | P62858 | 40S ribosomal protein S28 OS=Mus musc         | 4 | 4 |
| 807  | P97310 | DNA replication licensing factor MCM2 (       | 4 | 4 |
| 826  | Q00612 | Glucose-6-phosphate 1-dehydrogenase X         | 4 | 4 |
| 1199 | Q3U740 | Eukaryotic translation initiation factor 6 C  | 4 | 4 |
| 1207 | Q3U818 | Eukaryotic translation initiation factor 6 C  | 4 | 4 |
| 1223 | Q3U8X1 | Eukaryotic translation initiation factor 3 si | 4 | 4 |
| 1240 | Q3UA13 | Eukaryotic translation initiation factor 6 C  | 4 | 4 |
| 1268 | Q3UBJ6 | Eukaryotic translation initiation factor 6 C  | 4 | 4 |
| 1336 | Q3UJN1 | DNA helicase OS=Mus musculus GN=Mt            | 4 | 4 |
| 1393 | Q3UPI8 | Transporter OS=Mus musculus GN=Slc6ε          | 4 | 4 |

|      |        |                                               |   |   |
|------|--------|-----------------------------------------------|---|---|
| 1524 | Q545K4 | Eukaryotic translation initiation factor 6 C  | 4 | 4 |
| 1608 | Q5SUR0 | Phosphoribosylformylglycinamide synt          | 4 | 4 |
| 1743 | Q6IRT4 | Eukaryotic translation initiation factor 3 s1 | 4 | 4 |
| 1905 | Q8BGK6 | Y+L amino acid transporter 2 OS=Mus m         | 4 | 4 |
| 1908 | Q8BH35 | Complement component C8 beta chain O          | 4 | 4 |
| 1975 | Q8BTW2 | Eukaryotic translation initiation factor 3 s1 | 4 | 4 |
| 2016 | Q8C1W9 | Putative uncharacterized protein OS=Mus       | 4 | 4 |
| 2127 | Q8QZY6 | Tetraspanin-14 OS=Mus musculus GN=T           | 4 | 4 |
| 2364 | Q9D1P4 | Cysteine and histidine-rich domain-contai     | 4 | 4 |
| 2412 | Q9DCH4 | Eukaryotic translation initiation factor 3 s1 | 4 | 4 |
| 2519 | Q9WU28 | Prefoldin subunit 5 OS=Mus musculus G         | 4 | 4 |
| 2530 | Q9WVA3 | Mitotic checkpoint protein BUB3 OS=M          | 4 | 4 |
| 256  | E9Q9H3 | DnaJ homolog subfamily C member 2 OS          | 4 | 3 |
| 268  | E9QLW5 | Insulin-like growth factor II OS=Mus mus      | 4 | 3 |
| 315  | F8WJ41 | 40S ribosomal protein S15a (Fragment) O       | 4 | 3 |
| 569  | P24668 | Cation-dependent mannose-6-phosphate r        | 4 | 3 |
| 603  | P31786 | Acyl-CoA-binding protein OS=Mus musc          | 4 | 3 |
| 682  | P54103 | DnaJ homolog subfamily C member 2 OS          | 4 | 3 |
| 698  | P59325 | Eukaryotic translation initiation factor 5 C  | 4 | 3 |
| 710  | P61164 | Alpha-centractin OS=Mus musculus GN=          | 4 | 3 |
| 749  | P62869 | Transcription elongation factor B polypep     | 4 | 3 |
| 841  | Q05CH7 | Eif5 protein OS=Mus musculus GN=Eif5          | 4 | 3 |
| 883  | Q3T9G9 | Putative uncharacterized protein OS=Mus       | 4 | 3 |
| 905  | Q3TC45 | Protein S100-A10 OS=Mus musculus GN           | 4 | 3 |
| 957  | Q3THC1 | Proteasome (Prosome, macropain) 26S su        | 4 | 3 |
| 1026 | Q3TKY2 | Putative uncharacterized protein (Fragmer     | 4 | 3 |
| 1064 | Q3TPZ2 | Serine/threonine-protein kinase PLK OS=       | 4 | 3 |
| 1091 | Q3TV20 | Putative uncharacterized protein OS=Mus       | 4 | 3 |
| 1113 | Q3TXC4 | Putative uncharacterized protein OS=Mus       | 4 | 3 |
| 1186 | Q3U670 | Putative uncharacterized protein OS=Mus       | 4 | 3 |
| 1221 | Q3U8U1 | Putative uncharacterized protein OS=Mus       | 4 | 3 |
| 1231 | Q3U9E2 | Proto-oncogene vav OS=Mus musculus G          | 4 | 3 |
| 1252 | Q3UAG9 | Putative uncharacterized protein OS=Mus       | 4 | 3 |
| 1253 | Q3UAH3 | Putative uncharacterized protein OS=Mus       | 4 | 3 |
| 1306 | Q3UF03 | Putative uncharacterized protein OS=Mus       | 4 | 3 |
| 1314 | Q3UG81 | Serine/threonine-protein kinase PLK OS=       | 4 | 3 |
| 1366 | Q3ULI3 | Putative uncharacterized protein OS=Mus       | 4 | 3 |
| 1377 | Q3UM45 | Protein phosphatase 1 regulatory subunit 1    | 4 | 3 |
| 1434 | Q3UYK2 | Presenilin OS=Mus musculus GN=Psen1           | 4 | 3 |
| 1453 | Q3V441 | Tyrosine-protein phosphatase non-recepto      | 4 | 3 |



|      |        |                                             |   |   |
|------|--------|---------------------------------------------|---|---|
| 1553 | Q5BLK2 | 40S ribosomal protein S20 OS=Mus musc       | 4 | 3 |
| 1579 | Q5M9L1 | 60S ribosomal protein L36 OS=Mus musc       | 4 | 3 |
| 1582 | Q5M9M4 | 40S ribosomal protein S15a OS=Mus mus       | 4 | 3 |
| 1652 | Q61024 | Asparagine synthetase [glutamine-hydroly    | 4 | 3 |
| 1657 | Q61152 | Tyrosine-protein phosphatase non-recepto    | 4 | 3 |
| 1810 | Q6ZWZ4 | 60S ribosomal protein L36 OS=Mus musc       | 4 | 3 |
| 1822 | Q792Z1 | MCG140784 OS=Mus musculus GN=Try            | 4 | 3 |
| 1942 | Q8BMJ3 | Eukaryotic translation initiation factor 1A | 4 | 3 |
| 2113 | Q8K2H4 | Arf-GAP with coiled-coil, ANK repeat an     | 4 | 3 |
| 2294 | Q9CR00 | 26S proteasome non-ATPase regulatory su     | 4 | 3 |
| 2321 | Q9CXW4 | 60S ribosomal protein L11 OS=Mus musc       | 4 | 3 |
| 2346 | Q9CZY3 | Ubiquitin-conjugating enzyme E2 variant     | 4 | 3 |
| 2347 | Q9CZZ4 | Putative uncharacterized protein OS=Mus     | 4 | 3 |
| 2358 | Q9D0R2 | Threonine--tRNA ligase, cytoplasmic OS=     | 4 | 3 |
| 2454 | Q9JKB1 | Ubiquitin carboxyl-terminal hydrolase iso   | 4 | 3 |
| 2508 | Q9R1P3 | Proteasome subunit beta type-2 OS=Mus       | 4 | 3 |
| 2511 | Q9R1T2 | SUMO-activating enzyme subunit 1 OS=        | 4 | 3 |
| 2537 | Q9Z0G0 | PDZ domain-containing protein GIPC1 O       | 4 | 3 |
| 69   | A6H6M8 | Coiled-coil domain containing 50 OS=Mu      | 4 | 2 |
| 72   | A7VL18 | Gamma-aminobutyraldehyde dehydrogen:        | 4 | 2 |
| 291  | F6UK66 | Coiled-coil domain-containing protein 50    | 4 | 2 |
| 515  | P14094 | Sodium/potassium-transporting ATPase su     | 4 | 2 |
| 606  | P32067 | Lupus La protein homolog OS=Mus musc        | 4 | 2 |
| 692  | P56480 | ATP synthase subunit beta, mitochondrial    | 4 | 2 |
| 705  | P60904 | DnaJ homolog subfamily C member 5 OS        | 4 | 2 |
| 740  | P62814 | V-type proton ATPase subunit B, brain iso   | 4 | 2 |
| 876  | Q32P00 | Chromobox homolog 3 (Drosophila HP1 g       | 4 | 2 |
| 944  | Q3TG93 | Putative uncharacterized protein OS=Mus     | 4 | 2 |
| 960  | Q3THE7 | Putative uncharacterized protein OS=Mus     | 4 | 2 |
| 961  | Q3THH1 | Putative uncharacterized protein OS=Mus     | 4 | 2 |
| 1007 | Q3TJB4 | Putative uncharacterized protein OS=Mus     | 4 | 2 |
| 1014 | Q3TJL8 | Putative uncharacterized protein OS=Mus     | 4 | 2 |
| 1019 | Q3TK27 | Putative uncharacterized protein OS=Mus     | 4 | 2 |
| 1049 | Q3TML0 | Protein disulfide-isomerase A6 OS=Mus r     | 4 | 2 |
| 1051 | Q3TMT4 | Putative uncharacterized protein OS=Mus     | 4 | 2 |
| 1092 | Q3TV47 | Sodium/potassium-transporting ATPase su     | 4 | 2 |
| 1146 | Q3U1S6 | Cold shock domain-containing protein E1     | 4 | 2 |
| 1287 | Q3UDG0 | Putative uncharacterized protein OS=Mus     | 4 | 2 |
| 1312 | Q3UFZ6 | Putative uncharacterized protein (Fragmer   | 4 | 2 |
| 1381 | Q3UMT1 | Protein phosphatase 1 regulatory subunit 1  | 4 | 2 |

|      |        |                                            |   |   |
|------|--------|--------------------------------------------|---|---|
| 1385 | Q3UNK5 | Transforming growth factor beta-1 OS=M     | 4 | 2 |
| 1542 | Q571J7 | Serine/threonine-protein phosphatase 2A    | 4 | 2 |
| 1645 | Q60865 | Caprin-1 OS=Mus musculus GN=Caprin1        | 4 | 2 |
| 1836 | Q7TNC4 | Putative RNA-binding protein Luc7-like 2   | 4 | 2 |
| 1844 | Q7TQI3 | Ubiquitin thioesterase OTUB1 OS=Mus n      | 4 | 2 |
| 1911 | Q8BHC2 | 2400003C14Rik protein OS=Mus muscul        | 4 | 2 |
| 1973 | Q8BTU4 | Putative uncharacterized protein OS=Mus    | 4 | 2 |
| 2094 | Q8CI11 | Guanine nucleotide-binding protein-like 3  | 4 | 2 |
| 2224 | Q922R8 | Protein disulfide-isomerase A6 OS=Mus r    | 4 | 2 |
| 2313 | Q9CX00 | IST1 homolog OS=Mus musculus GN=Ist        | 4 | 2 |
| 2320 | Q9CXW3 | Calcyclin-binding protein OS=Mus muscu     | 4 | 2 |
| 2389 | Q9DAB4 | Putative uncharacterized protein OS=Mus    | 4 | 2 |
| 2408 | Q9DCC5 | Cbx3 protein OS=Mus musculus GN=Cbx        | 4 | 2 |
| 2465 | Q9JLJ2 | 4-trimethylaminobutyraldehyde dehydrog     | 4 | 2 |
| 2507 | Q9R1P1 | Proteasome subunit beta type-3 OS=Mus      | 4 | 2 |
| 27   | A2A9X5 | 5'(3')-deoxyribonucleotidase, cytosolic ty | 4 | 0 |
| 47   | A2AQL0 | STE20/SPS1-related proline-alanine-rich    | 4 | 0 |
| 423  | O55029 | Coatomer subunit beta' OS=Mus musculu      | 4 | 0 |
| 427  | O55142 | 60S ribosomal protein L35a OS=Mus mus      | 4 | 0 |
| 451  | O89110 | Caspase-8 OS=Mus musculus GN=Casp8         | 4 | 0 |
| 488  | P09793 | Cytotoxic T-lymphocyte protein 4 OS=M      | 4 | 0 |
| 615  | P35330 | Intercellular adhesion molecule 2 OS=M     | 4 | 0 |
| 686  | P54822 | Adenylosuccinate lyase OS=Mus musculu      | 4 | 0 |
| 1045 | Q3TMB8 | Adenylosuccinate lyase OS=Mus musculu      | 4 | 0 |
| 1473 | Q4FK85 | Casp8 protein OS=Mus musculus GN=Ca        | 4 | 0 |
| 1741 | Q6GTR6 | Cytotoxic T-lymphocyte protein 4 OS=M      | 4 | 0 |
| 1832 | Q7TMX1 | Cytotoxic T-lymphocyte-associated protei   | 4 | 0 |
| 1961 | Q8BQV7 | Putative uncharacterized protein OS=Mus    | 4 | 0 |
| 2116 | Q8K2Q7 | BRO1 domain-containing protein BROX        | 4 | 0 |
| 2260 | Q99M51 | Cytoplasmic protein NCK1 OS=Mus mus        | 4 | 0 |
| 114  | B2RU38 | CD84 antigen OS=Mus musculus GN=Cd         | 4 | 0 |
| 137  | B7ZMQ1 | Cd84 protein OS=Mus musculus GN=Cd         | 4 | 0 |
| 192  | D3Z7W5 | CD27 antigen OS=Mus musculus GN=Cd         | 4 | 0 |
| 253  | E9Q9E8 | SLAM family member 5 OS=Mus muscul         | 4 | 0 |
| 302  | F7D1I5 | Glycophorin-C OS=Mus musculus GN=G         | 4 | 0 |
| 368  | J3QNW0 | DNA (cytosine-5)-methyltransferase OS=     | 4 | 0 |
| 512  | P13609 | Serglycin OS=Mus musculus GN=Srgn Pl       | 4 | 0 |
| 513  | P13864 | DNA (cytosine-5)-methyltransferase 1 OS    | 4 | 0 |
| 834  | Q03265 | ATP synthase subunit alpha, mitochondria   | 4 | 0 |
| 866  | Q18PI6 | SLAM family member 5 OS=Mus muscul         | 4 | 0 |

|      |        |                                               |   |   |
|------|--------|-----------------------------------------------|---|---|
| 1130 | Q3TZU7 | Sorting nexin OS=Mus musculus GN=Sn:          | 4 | 0 |
| 1168 | Q3U4X0 | CD27 antigen OS=Mus musculus GN=Cd            | 4 | 0 |
| 1324 | Q3UHZ3 | DNA (cytosine-5)-methyltransferase OS=        | 4 | 0 |
| 1849 | Q7TSJ0 | DNA (cytosine-5)-methyltransferase OS=        | 4 | 0 |
| 2175 | Q91VH2 | Sorting nexin-9 OS=Mus musculus GN=S          | 4 | 0 |
| 737  | P62717 | 60S ribosomal protein L18a OS=Mus mus         | 3 | 7 |
| 2235 | Q99J93 | Interferon-induced transmembrane proteir      | 3 | 7 |
| 2418 | Q9EPL8 | Importin-7 OS=Mus musculus GN=Ipo7 I          | 3 | 7 |
| 318  | F8WJK8 | Hsc70-interacting protein OS=Mus muscu        | 3 | 6 |
| 1212 | Q3U8D2 | Putative uncharacterized protein OS=Mus       | 3 | 6 |
| 1239 | Q3U9V1 | Putative uncharacterized protein OS=Mus       | 3 | 6 |
| 2251 | Q99L47 | Hsc70-interacting protein OS=Mus muscu        | 3 | 6 |
| 2276 | Q9CQ60 | 6-phosphogluconolactonase OS=Mus mus          | 3 | 6 |
| 196  | E0CYQ2 | NudC domain-containing protein 2 OS=M         | 3 | 5 |
| 794  | P70658 | C-X-C chemokine receptor type 4 OS=Mt         | 3 | 5 |
| 1010 | Q3TJG6 | Putative uncharacterized protein OS=Mus       | 3 | 5 |
| 1807 | Q6ZWX6 | Eukaryotic translation initiation factor 2 si | 3 | 5 |
| 2502 | Q9R0Q7 | Prostaglandin E synthase 3 OS=Mus musc        | 3 | 5 |
| 20   | A2A813 | Protein deglycase DJ-1 OS=Mus musculu         | 3 | 4 |
| 195  | E0CY63 | Claudin domain-containing protein 1 (Fra;     | 3 | 4 |
| 310  | F8WHM5 | Golgi apparatus protein 1 (Fragment) OS=      | 3 | 4 |
| 406  | O35593 | 26S proteasome non-ATPase regulatory si       | 3 | 4 |
| 614  | P35293 | Ras-related protein Rab-18 OS=Mus musc        | 3 | 4 |
| 789  | P70423 | Cationic amino acid transporter 3 OS=Mt       | 3 | 4 |
| 894  | Q3TAH3 | Putative uncharacterized protein OS=Mus       | 3 | 4 |
| 923  | Q3TED1 | S-adenosylmethionine synthase OS=Mus :        | 3 | 4 |
| 1047 | Q3TMH5 | Putative uncharacterized protein OS=Mus       | 3 | 4 |
| 1281 | Q3UD26 | Putative uncharacterized protein OS=Mus       | 3 | 4 |
| 1315 | Q3UGA8 | Amidophosphoribosyltransferase OS=Mt          | 3 | 4 |
| 1668 | Q61543 | Golgi apparatus protein 1 OS=Mus muscu        | 3 | 4 |
| 1781 | Q6PDI5 | Proteasome-associated protein ECM29 ho        | 3 | 4 |
| 1803 | Q6ZWU9 | 40S ribosomal protein S27 OS=Mus musc         | 3 | 4 |
| 1873 | Q80X81 | Acetyl-Coenzyme A acetyltransferase 3 O       | 3 | 4 |
| 2105 | Q8K124 | Pleckstrin homology domain-containing fi      | 3 | 4 |
| 2138 | Q8R2Q8 | Bone marrow stromal antigen 2 OS=Mus :        | 3 | 4 |
| 2142 | Q8R379 | GTPase, IMAP family member 7 OS=Mt            | 3 | 4 |
| 2145 | Q8R4V3 | Acetyl CoA transferase-like protein OS=N      | 3 | 4 |
| 2215 | Q921W7 | Putative uncharacterized protein Tes OS=      | 3 | 4 |
| 2257 | Q99LX0 | Protein deglycase DJ-1 OS=Mus musculu         | 3 | 4 |
| 2269 | Q9CPP0 | Nucleoplasmin-3 OS=Mus musculus GN=           | 3 | 4 |

|      |        |                                            |   |   |
|------|--------|--------------------------------------------|---|---|
| 2293 | Q9CQX5 | Claudin domain-containing protein 1 OS=    | 3 | 4 |
| 2450 | Q9JJH0 | N-acetylneuraminic acid 9-phosphate synt   | 3 | 4 |
| 2461 | Q9JKX6 | ADP-sugar pyrophosphatase OS=Mus mu        | 3 | 4 |
| 48   | A2ATI9 | Golgi reassembly stacking protein 2, isofc | 3 | 3 |
| 718  | P61957 | Small ubiquitin-related modifier 2 OS=M    | 3 | 3 |
| 787  | P70349 | Histidine triad nucleotide-binding protein | 3 | 3 |
| 797  | P70698 | CTP synthase 1 OS=Mus musculus GN=C        | 3 | 3 |
| 820  | P97825 | Hematological and neurological expressec   | 3 | 3 |
| 864  | Q14AI7 | COP9 (Constitutive photomorphogenic) h     | 3 | 3 |
| 869  | Q1HDU4 | ArhGAP9 OS=Mus musculus GN=Arhga           | 3 | 3 |
| 942  | Q3TG07 | Putative uncharacterized protein OS=Mus    | 3 | 3 |
| 989  | Q3TIJ1 | Putative uncharacterized protein OS=Mus    | 3 | 3 |
| 1029 | Q3TL27 | Putative uncharacterized protein OS=Mus    | 3 | 3 |
| 1031 | Q3TL58 | Putative uncharacterized protein OS=Mus    | 3 | 3 |
| 1097 | Q3TVV7 | Putative uncharacterized protein OS=Mus    | 3 | 3 |
| 1109 | Q3TX06 | Putative uncharacterized protein OS=Mus    | 3 | 3 |
| 1171 | Q3U505 | Putative uncharacterized protein (Fragmer  | 3 | 3 |
| 1301 | Q3UE92 | X-prolyl aminopeptidase (Aminopeptidas     | 3 | 3 |
| 1305 | Q3UER8 | Fibrinogen gamma chain OS=Mus muscu        | 3 | 3 |
| 1333 | Q3UJ70 | Putative uncharacterized protein OS=Mus    | 3 | 3 |
| 1353 | Q3UKF5 | X-prolyl aminopeptidase OS=Mus muscu       | 3 | 3 |
| 1399 | Q3UQY7 | Putative uncharacterized protein (Fragmer  | 3 | 3 |
| 1425 | Q3UWQ9 | Putative uncharacterized protein OS=Mus    | 3 | 3 |
| 1519 | Q544K9 | Uridine 5'-monophosphate synthase OS=M     | 3 | 3 |
| 1543 | Q571J8 | MKIAA4207 protein (Fragment) OS=Mus        | 3 | 3 |
| 1685 | Q61833 | Ribophorin OS=Mus musculus GN=Rpn2         | 3 | 3 |
| 1769 | Q6P7V9 | Structural maintenance of chromosomes p    | 3 | 3 |
| 1817 | Q78T58 | Putative uncharacterized protein OS=Mus    | 3 | 3 |
| 2100 | Q8JZK9 | Hydroxymethylglutaryl-CoA synthase, cy     | 3 | 3 |
| 2103 | Q8K0I5 | 3-hydroxy-3-methylglutaryl-Coenzyme A      | 3 | 3 |
| 2125 | Q8QZW8 | Protein Arhgap9 OS=Mus musculus GN=        | 3 | 3 |
| 2149 | Q8VCM7 | Fibrinogen gamma chain OS=Mus muscu        | 3 | 3 |
| 2240 | Q99JX3 | Golgi reassembly-stacking protein 2 OS=l   | 3 | 3 |
| 2391 | Q9DAW9 | Calponin-3 OS=Mus musculus GN=Cnn3         | 3 | 3 |
| 2395 | Q9DBG6 | Dolichyl-diphosphooligosaccharide--prote   | 3 | 3 |
| 2562 | S4R1I3 | Xaa-Pro aminopeptidase 1 OS=Mus musc       | 3 | 3 |
| 58   | A2RS23 | Peptidase D OS=Mus musculus GN=Pepd        | 3 | 2 |
| 60   | A2RSY7 | Perforin 1 (Pore forming protein) OS=Mus   | 3 | 2 |
| 85   | B1AT92 | Growth factor receptor-bound protein 2 O   | 3 | 2 |
| 144  | B7ZWB3 | Skap1 protein OS=Mus musculus GN=Sk        | 3 | 2 |

|      |          |                                            |   |   |
|------|----------|--------------------------------------------|---|---|
| 187  | D3Z6Q9   | Bridging integrator 2 OS=Mus musculus C    | 3 | 2 |
| 287  | F6QYF8   | Puromycin-sensitive aminopeptidase (Fra    | 3 | 2 |
| 360  | H3BKN0   | tRNA (cytosine(34)-C(5))-methyltransfer    | 3 | 2 |
| 421  | O54962   | Barrier-to-autointegration factor OS=Mus   | 3 | 2 |
| 436  | O70404   | Vesicle-associated membrane protein 8 O    | 3 | 2 |
| 477  | P08003   | Protein disulfide-isomerase A4 OS=Mus r    | 3 | 2 |
| 613  | P35285   | Ras-related protein Rab-22A OS=Mus mu      | 3 | 2 |
| 810  | P97355   | Spermine synthase OS=Mus musculus GN       | 3 | 2 |
| 851  | Q08481   | Platelet endothelial cell adhesion molecu  | 3 | 2 |
| 870  | Q1HFZ0   | tRNA (cytosine(34)-C(5))-methyltransfer    | 3 | 2 |
| 1145 | Q3U1Q4   | Putative uncharacterized protein OS=Mus    | 3 | 2 |
| 1158 | Q3U3F4   | Putative uncharacterized protein OS=Mus    | 3 | 2 |
| 1382 | Q3UN35   | Beta-1,4 N-acetylgalactosaminyltransfer    | 3 | 2 |
| 1411 | Q3UUV5   | Src kinase-associated phosphoprotein 1 O   | 3 | 2 |
| 1629 | Q60631   | Growth factor receptor-bound protein 2 O   | 3 | 2 |
| 1634 | Q60668-3 | Isoform 3 of Heterogeneous nuclear ribon   | 3 | 2 |
| 1700 | Q62422   | Osteoclast-stimulating factor 1 OS=Mus n   | 3 | 2 |
| 1757 | Q6P2B2   | Casein kinase I isoform gamma-1 OS=M       | 3 | 2 |
| 1761 | Q6P5B0   | RRP12-like protein OS=Mus musculus Gl      | 3 | 2 |
| 1901 | Q8BGB2   | Tetratricopeptide repeat protein 7A OS=M   | 3 | 2 |
| 1924 | Q8BJW6-2 | Isoform 2 of Eukaryotic translation initi  | 3 | 2 |
| 1957 | Q8BQ03   | DNA helicase OS=Mus musculus GN=M          | 3 | 2 |
| 1999 | Q8BY71   | Histone acetyltransferase type B catalytic | 3 | 2 |
| 2017 | Q8C1Z0   | Putative uncharacterized protein OS=Mus    | 3 | 2 |
| 2057 | Q8C9V1   | Carabin OS=Mus musculus GN=Tbc1d10         | 3 | 2 |
| 2208 | Q91ZX7   | Prolow-density lipoprotein receptor-relate | 3 | 2 |
| 2231 | Q93092   | Transaldolase OS=Mus musculus GN=Ta        | 3 | 2 |
| 2288 | Q9CQR6   | Serine/threonine-protein phosphatase 6 ca  | 3 | 2 |
| 2352 | Q9D094   | Putative uncharacterized protein OS=Mus    | 3 | 2 |
| 2384 | Q9D892   | Inosine triphosphate pyrophosphatase OS-   | 3 | 2 |
| 2396 | Q9DBH5   | Vesicular integral-membrane protein VIP    | 3 | 2 |
| 35   | A2AH85   | 116 kDa U5 small nuclear ribonucleoprot    | 3 | 0 |
| 52   | A2AUR7   | Ras suppressor protein 1 OS=Mus muscul     | 3 | 0 |
| 124  | B2RXV4   | Feline leukemia virus subgroup C recepto   | 3 | 0 |
| 211  | E9PWZ6   | Unconventional myosin-IXb OS=Mus mu        | 3 | 0 |
| 216  | E9PYI8   | Ubiquitin carboxyl-terminal hydrolase 14   | 3 | 0 |
| 266  | E9QKV6   | Unconventional myosin-IXb OS=Mus mu        | 3 | 0 |
| 307  | F8WGR0   | Alpha-adducin OS=Mus musculus GN=A         | 3 | 0 |
| 311  | F8WHZ9   | Alpha-adducin OS=Mus musculus GN=A         | 3 | 0 |
| 353  | H3BJ45   | Rho guanine nucleotide exchange factor 2   | 3 | 0 |

|      |          |                                               |   |   |
|------|----------|-----------------------------------------------|---|---|
| 402  | O35381   | Acidic leucine-rich nuclear phosphoprotei     | 3 | 0 |
| 497  | P11031   | Activated RNA polymerase II transcriptio      | 3 | 0 |
| 593  | P28658   | Ataxin-10 OS=Mus musculus GN=Atxn10           | 3 | 0 |
| 616  | P35456-2 | Isoform 2 of Urokinase plasminogen activ      | 3 | 0 |
| 668  | P49442   | Inositol polyphosphate 1-phosphatase OS=      | 3 | 0 |
| 830  | Q01730   | Ras suppressor protein 1 OS=Mus muscul        | 3 | 0 |
| 853  | Q08943   | FACT complex subunit SSRP1 OS=Mus 1           | 3 | 0 |
| 854  | Q08943-2 | Isoform 2 of FACT complex subunit SSR         | 3 | 0 |
| 907  | Q3TCF4   | Putative uncharacterized protein OS=Mus       | 3 | 0 |
| 955  | Q3THA0   | Eukaryotic translation initiation factor 3 si | 3 | 0 |
| 1024 | Q3TKP3   | Putative uncharacterized protein OS=Mus       | 3 | 0 |
| 1122 | Q3TY45   | Putative uncharacterized protein OS=Mus       | 3 | 0 |
| 1355 | Q3UKS3   | Single immunoglobulin and toll-interleuki     | 3 | 0 |
| 1439 | Q3V005   | Putative uncharacterized protein OS=Mus       | 3 | 0 |
| 1621 | Q5U4D8   | Sodium-dependent multivitamin transport       | 3 | 0 |
| 1623 | Q5XJY5   | Coatomer subunit delta OS=Mus musculu         | 3 | 0 |
| 1846 | Q7TS64   | Adrenergic receptor kinase, beta 1 OS=M       | 3 | 0 |
| 1872 | Q80X50-2 | Isoform 2 of Ubiquitin-associated protein     | 3 | 0 |
| 1891 | Q811M6   | Interferon gamma induced GTPase OS=M          | 3 | 0 |
| 1902 | Q8BGB5   | LIM domain-containing protein 2 OS=M          | 3 | 0 |
| 1928 | Q8BK67   | Protein RCC2 OS=Mus musculus GN=Rc            | 3 | 0 |
| 2111 | Q8K232   | Adducin 1 (Alpha) OS=Mus musculus GN          | 3 | 0 |
| 2264 | Q99MK8   | Beta-adrenergic receptor kinase 1 OS=M        | 3 | 0 |
| 2286 | Q9CQM9   | Glutaredoxin-3 OS=Mus musculus GN=C           | 3 | 0 |
| 2298 | Q9CRB2   | H/ACA ribonucleoprotein complex subun         | 3 | 0 |
| 2349 | Q9D031   | Ras suppressor protein 1 OS=Mus muscul        | 3 | 0 |
| 2393 | Q9DB34   | Charged multivesicular body protein 2a O      | 3 | 0 |
| 2411 | Q9DCE9   | Protein Igtp OS=Mus musculus GN=Igtp          | 3 | 0 |
| 2483 | Q9QYC0   | Alpha-adducin OS=Mus musculus GN=A            | 3 | 0 |
| 2489 | Q9QZF2   | Glypican-1 OS=Mus musculus GN=Gpc1            | 3 | 0 |
| 67   | A5D6Q8   | Clasp1 protein OS=Mus musculus GN=Cl          | 3 | 0 |
| 78   | B1AQR8   | Galectin OS=Mus musculus GN=Lgals9 F          | 3 | 0 |
| 91   | B1AVH4   | Coronin OS=Mus musculus GN=Coro2a 1           | 3 | 0 |
| 92   | B1AVH5   | Coronin OS=Mus musculus GN=Coro2a 1           | 3 | 0 |
| 157  | B9EKT6   | IQ motif containing GTPase activating pr      | 3 | 0 |
| 224  | E9Q197   | Glyoxalase domain-containing protein 4 C      | 3 | 0 |
| 226  | E9Q2T4   | Protein 4930523C07Rik OS=Mus muscul           | 3 | 0 |
| 300  | F7AVU1   | Cerebral cavernous malformations protein      | 3 | 0 |
| 336  | G3X9T7   | Galectin OS=Mus musculus GN=Lgals9 F          | 3 | 0 |
| 381  | O08573   | Galectin-9 OS=Mus musculus GN=Lgals9          | 3 | 0 |

|      |        |                                            |   |   |
|------|--------|--------------------------------------------|---|---|
| 498  | P11087 | Collagen alpha-1(I) chain OS=Mus muscu     | 3 | 0 |
| 564  | P23492 | Purine nucleoside phosphorylase OS=Mus     | 3 | 0 |
| 721  | P62046 | Leucine-rich repeat and calponin homolog   | 3 | 0 |
| 889  | Q3TA00 | Putative uncharacterized protein OS=Mus    | 3 | 0 |
| 1041 | Q3TM53 | Putative uncharacterized protein (Fragmer  | 3 | 0 |
| 1159 | Q3U3P5 | Putative uncharacterized protein OS=Mus    | 3 | 0 |
| 1388 | Q3UP01 | Putative uncharacterized protein (Fragmer  | 3 | 0 |
| 1510 | Q543E3 | Suppressor of tumorigenicity 14 protein h  | 3 | 0 |
| 1513 | Q543K9 | Purine nucleoside phosphorylase OS=Mus     | 3 | 0 |
| 1516 | Q543Y7 | Protein kinase C and casein kinase substra | 3 | 0 |
| 1556 | Q5D0E4 | SH2 domain protein 2A OS=Mus musculi       | 3 | 0 |
| 1738 | Q6DFW4 | Nucleolar protein 58 OS=Mus musculus C     | 3 | 0 |
| 1770 | Q6P8X1 | Sorting nexin-6 OS=Mus musculus GN=S       | 3 | 0 |
| 1893 | Q8BFQ3 | Ovarian cancer G-protein coupled recepto   | 3 | 0 |
| 2041 | Q8C4J7 | Transducin beta-like protein 3 OS=Mus nr   | 3 | 0 |
| 2112 | Q8K242 | Tgtp protein OS=Mus musculus PE=2 SV       | 3 | 0 |
| 2118 | Q8K2Y9 | Cerebral cavernous malformations protein   | 3 | 0 |
| 2272 | Q9CPV4 | Glyoxalase domain-containing protein 4 C   | 3 | 0 |
| 2478 | Q9QXK9 | SH2 domain-containing protein 2A OS=N      | 3 | 0 |
| 201  | E9PV24 | Fibrinogen alpha chain OS=Mus musculi      | 2 | 7 |
| 1864 | Q80UL9 | Junctional adhesion molecule-like OS=M     | 2 | 6 |
| 2443 | Q9JI48 | Placenta-specific gene 8 protein OS=Mus    | 2 | 6 |
| 320  | G3UXL2 | Protein Prps113 OS=Mus musculus GN=P       | 2 | 5 |
| 469  | P05533 | Lymphocyte antigen 6A-2/6E-1 OS=Mus        | 2 | 5 |
| 1117 | Q3TXL0 | Putative uncharacterized protein (Fragmer  | 2 | 5 |
| 1302 | Q3UEG9 | Putative uncharacterized protein OS=Mus    | 2 | 5 |
| 1467 | Q4FJZ3 | Ero11 protein OS=Mus musculus GN=Ero       | 2 | 5 |
| 1472 | Q4FK57 | ERO1-like protein alpha OS=Mus muscul      | 2 | 5 |
| 1604 | Q5SS83 | Flotillin 2, isoform CRA_a OS=Mus musc     | 2 | 5 |
| 1630 | Q60634 | Flotillin-2 OS=Mus musculus GN=Flot2 I     | 2 | 5 |
| 2014 | Q8C1L7 | 40S ribosomal protein S21 OS=Mus musc      | 2 | 5 |
| 2287 | Q9CQR2 | 40S ribosomal protein S21 OS=Mus musc      | 2 | 5 |
| 2402 | Q9DC36 | Putative uncharacterized protein OS=Mus    | 2 | 5 |
| 64   | A3KGQ6 | Actin-related protein 2/3 complex subunit  | 2 | 4 |
| 145  | B7ZWC0 | N-myc downstream regulated gene 1 OS=      | 2 | 4 |
| 400  | O35344 | Importin subunit alpha-4 OS=Mus muscul     | 2 | 4 |
| 441  | O88543 | COP9 signalosome complex subunit 3 OS      | 2 | 4 |
| 912  | Q3TD08 | Putative uncharacterized protein OS=Mus    | 2 | 4 |
| 914  | Q3TD51 | Putative uncharacterized protein OS=Mus    | 2 | 4 |
| 1526 | Q545R3 | N-myc downstream regulated gene 1 OS=      | 2 | 4 |

|      |          |                                            |   |   |
|------|----------|--------------------------------------------|---|---|
| 1537 | Q570Z8   | MKIAA4114 protein (Fragment) OS=Mus        | 2 | 4 |
| 1823 | Q7M6Y3   | Phosphatidylinositol-binding clathrin asse | 2 | 4 |
| 2213 | Q921G6   | Leucine-rich repeat and calponin homolog   | 2 | 4 |
| 2261 | Q99M54   | Cell division cycle-associated protein 3 O | 2 | 4 |
| 2344 | Q9CZV9   | Putative uncharacterized protein OS=Mus    | 2 | 4 |
| 2379 | Q9D771   | Transmembrane protein 206 OS=Mus mu:       | 2 | 4 |
| 2414 | Q9DCT8   | Cysteine-rich protein 2 OS=Mus musculu:    | 2 | 4 |
| 2432 | Q9EST5-2 | Isoform 2 of Acidic leucine-rich nuclear p | 2 | 4 |
| 279  | E9QPI5   | Sister chromatid cohesion protein PDS5 h   | 2 | 3 |
| 652  | P46664   | Adenylosuccinate synthetase isozyme 2 O    | 2 | 3 |
| 707  | P61082   | NEDD8-conjugating enzyme Ubc12 OS=]        | 2 | 3 |
| 761  | P63024   | Vesicle-associated membrane protein 3 O:   | 2 | 3 |
| 836  | Q04750   | DNA topoisomerase 1 OS=Mus musculus        | 2 | 3 |
| 887  | Q3T9U1   | MOB kinase activator 1B OS=Mus muscu       | 2 | 3 |
| 1215 | Q3U8L9   | Putative uncharacterized protein OS=Mus    | 2 | 3 |
| 1293 | Q3UDM0   | MOB kinase activator 1B OS=Mus muscu       | 2 | 3 |
| 1545 | Q58E29   | Proteolipid protein 2 OS=Mus musculus C    | 2 | 3 |
| 1694 | Q62318   | Transcription intermediary factor 1-beta C | 2 | 3 |
| 1845 | Q7TQI7   | Ankyrin repeat and BTB/POZ domain-cor      | 2 | 3 |
| 1913 | Q8BHL3   | TBC1 domain family member 10B OS=M         | 2 | 3 |
| 2093 | Q8CHP8   | Phosphoglycolate phosphatase OS=Mus n      | 2 | 3 |
| 2181 | Q91VW3   | SH3 domain-binding glutamic acid-rich-li   | 2 | 3 |
| 2216 | Q921Y0   | MOB kinase activator 1A OS=Mus muscu       | 2 | 3 |
| 2247 | Q99KP6   | Pre-mRNA-processing factor 19 OS=Mus       | 2 | 3 |
| 2442 | Q9JHU9   | Inositol-3-phosphate synthase 1 OS=Mus     | 2 | 3 |
| 2444 | Q9JIF7   | Coatomer subunit beta OS=Mus musculus      | 2 | 3 |
| 2477 | Q9QXB9   | Developmentally-regulated GTP-binding ]    | 2 | 3 |
| 2510 | Q9R1Q7   | Proteolipid protein 2 OS=Mus musculus C    | 2 | 3 |
| 109  | B2RQA7   | Ncapg protein OS=Mus musculus GN=Nc        | 2 | 2 |
| 198  | E9PUD2   | Dynamin-1-like protein OS=Mus musculu      | 2 | 2 |
| 208  | E9PWG6   | Protein Ncapg OS=Mus musculus GN=Nc        | 2 | 2 |
| 303  | F8VPU2   | FERM, RhoGEF and pleckstrin domain-co      | 2 | 2 |
| 331  | G3X8Y3   | N-alpha-acetyltransferase 15, NatA auxili  | 2 | 2 |
| 359  | H3BKH6   | S-formylglutathione hydrolase OS=Mus n     | 2 | 2 |
| 623  | P38647   | Stress-70 protein, mitochondrial OS=Mus    | 2 | 2 |
| 627  | P39429   | TNF receptor-associated factor 2 OS=Mus    | 2 | 2 |
| 628  | P39429-2 | Isoform 2 of TNF receptor-associated fact  | 2 | 2 |
| 650  | P46460   | Vesicle-fusing ATPase OS=Mus musculu:      | 2 | 2 |
| 683  | P54116   | Erythrocyte band 7 integral membrane prc   | 2 | 2 |
| 796  | P70677   | Caspase-3 OS=Mus musculus GN=Casp3         | 2 | 2 |



|      |        |                                             |   |   |
|------|--------|---------------------------------------------|---|---|
| 822  | P98064 | Mannan-binding lectin serine protease 1 C   | 2 | 2 |
| 1054 | Q3TN07 | Vacuolar protein sorting 4b (Yeast) OS=M    | 2 | 2 |
| 1065 | Q3TPZ5 | Dynactin 2 OS=Mus musculus GN=Dctn2         | 2 | 2 |
| 1107 | Q3TWR1 | Putative uncharacterized protein OS=Mus     | 2 | 2 |
| 1123 | Q3TYJ0 | Putative uncharacterized protein OS=Mus     | 2 | 2 |
| 1308 | Q3UF95 | Large proline-rich protein BAG6 OS=Mus      | 2 | 2 |
| 1344 | Q3UJW9 | Putative uncharacterized protein OS=Mus     | 2 | 2 |
| 1444 | Q3V1M8 | Putative uncharacterized protein OS=Mus     | 2 | 2 |
| 1515 | Q543N7 | Protein kinase C and casein kinase II subs  | 2 | 2 |
| 1539 | Q571D6 | MKIAA0281 protein (Fragment) OS=Mus         | 2 | 2 |
| 1712 | Q64433 | 10 kDa heat shock protein, mitochondrial    | 2 | 2 |
| 1717 | Q64727 | Vinculin OS=Mus musculus GN=Vcl PE=         | 2 | 2 |
| 1827 | Q7TML3 | Solute carrier family 35 member F2 OS=M     | 2 | 2 |
| 1865 | Q80UM3 | N-alpha-acetyltransferase 15, NatA auxili   | 2 | 2 |
| 1956 | Q8BPU7 | Engulfment and cell motility protein 1 OS   | 2 | 2 |
| 2050 | Q8C6X9 | Putative uncharacterized protein OS=Mus     | 2 | 2 |
| 2153 | Q8VDJ3 | Vigilin OS=Mus musculus GN=Hdlbp PE         | 2 | 2 |
| 2366 | Q9D1R9 | 60S ribosomal protein L34 OS=Mus musc       | 2 | 2 |
| 2427 | Q9ES52 | Phosphatidylinositol 3,4,5-trisphosphate 5  | 2 | 2 |
| 2430 | Q9ES94 | Cathepsin Z OS=Mus musculus GN=Ctsz         | 2 | 2 |
| 2445 | Q9JII6 | Alcohol dehydrogenase [NADP(+)] OS=M        | 2 | 2 |
| 2526 | Q9WUU7 | Cathepsin Z OS=Mus musculus GN=Ctsz         | 2 | 2 |
| 2553 | Q9Z1R2 | Large proline-rich protein BAG6 OS=Mus      | 2 | 2 |
| 44   | A2AQ41 | Formin-binding protein 1 OS=Mus muscu       | 2 | 0 |
| 45   | A2AQ42 | Formin-binding protein 1 OS=Mus muscu       | 2 | 0 |
| 169  | D3YYK8 | Microtubule-associated protein RP/EB far    | 2 | 0 |
| 214  | E9PYG5 | Gamma-parvin OS=Mus musculus GN=P           | 2 | 0 |
| 247  | E9Q6X0 | Microtubule-associated protein RP/EB far    | 2 | 0 |
| 295  | F6XC25 | Coiled-coil and C2 domain-containing prc    | 2 | 0 |
| 348  | G5E8S8 | MAGUK p55 subfamily member 7 OS=M           | 2 | 0 |
| 429  | O70133 | ATP-dependent RNA helicase A OS=Mus         | 2 | 0 |
| 440  | O88456 | Calpain small subunit 1 OS=Mus muscul       | 2 | 0 |
| 552  | P19324 | Serpin H1 OS=Mus musculus GN=Serp           | 2 | 0 |
| 617  | P35550 | rRNA 2'-O-methyltransferase fibrillar       | 2 | 0 |
| 659  | P47941 | Crk-like protein OS=Mus musculus GN=C       | 2 | 0 |
| 772  | P63254 | Cysteine-rich protein 1 OS=Mus muscul       | 2 | 0 |
| 844  | Q05D44 | Eukaryotic translation initiation factor 5B | 2 | 0 |
| 1008 | Q3TJF2 | Obg-like ATPase 1 OS=Mus musculus GI        | 2 | 0 |
| 1013 | Q3TJK3 | Putative uncharacterized protein OS=Mus     | 2 | 0 |
| 1050 | Q3TMM5 | Putative uncharacterized protein OS=Mus     | 2 | 0 |

|      |          |                                                   |   |   |
|------|----------|---------------------------------------------------|---|---|
| 1056 | Q3TN44   | Putative uncharacterized protein OS=Mus           | 2 | 0 |
| 1057 | Q3TN94   | Putative uncharacterized protein OS=Mus           | 2 | 0 |
| 1105 | Q3TWG9   | Putative uncharacterized protein OS=Mus           | 2 | 0 |
| 1227 | Q3U955   | Putative uncharacterized protein OS=Mus           | 2 | 0 |
| 1342 | Q3UJS2   | Putative uncharacterized protein OS=Mus           | 2 | 0 |
| 1445 | Q3V1Z7   | Putative uncharacterized protein OS=Mus           | 2 | 0 |
| 1488 | Q501J7   | Phosphatase and actin regulator 4 OS=Mus          | 2 | 0 |
| 1711 | Q64374   | Regucalcin OS=Mus musculus GN=Rgn I               | 2 | 0 |
| 1758 | Q6P3B4   | Cysteine-rich protein 1 (Intestinal) OS=M         | 2 | 0 |
| 1773 | Q6P9L6   | Kinesin-like protein KIF15 OS=Mus musc            | 2 | 0 |
| 1839 | Q7TPN1   | Cc2d1b protein (Fragment) OS=Mus musc             | 2 | 0 |
| 1983 | Q8BV87   | Putative uncharacterized protein OS=Mus           | 2 | 0 |
| 1984 | Q8BVD5   | MAGUK p55 subfamily member 7 OS=M                 | 2 | 0 |
| 1988 | Q8BVU9   | Putative uncharacterized protein OS=Mus           | 2 | 0 |
| 2097 | Q8CIG8   | Protein arginine N-methyltransferase 5 OS         | 2 | 0 |
| 2120 | Q8K2Z4-2 | Isoform 2 of Condensin complex subunit            | 2 | 0 |
| 2178 | Q91VR5   | ATP-dependent RNA helicase DDX1 OS=               | 2 | 0 |
| 2292 | Q9CQX2   | Cytochrome b5 type B OS=Mus musculus              | 2 | 0 |
| 2335 | Q9CZ30   | Obg-like ATPase 1 OS=Mus musculus Gl              | 2 | 0 |
| 3    | A0JNY7   | Eukaryotic translation initiation factor 4, $\xi$ | 2 | 0 |
| 77   | B0V2N1   | Receptor-type tyrosine-protein phosphatase        | 2 | 0 |
| 182  | D3Z4J5   | Golgi to ER traffic protein 4 homolog (Fra        | 2 | 0 |
| 220  | E9PZC3   | Flavin reductase (NADPH) OS=Mus musc              | 2 | 0 |
| 340  | G3XA17   | Eukaryotic translation initiation factor 4 g      | 2 | 0 |
| 357  | H3BK65   | Epidermal growth factor receptor substrat         | 2 | 0 |
| 641  | P42567   | Epidermal growth factor receptor substrat         | 2 | 0 |
| 910  | Q3TCR9   | Putative uncharacterized protein OS=Mus           | 2 | 0 |
| 1070 | Q3TRH2   | 26S proteasome non-ATPase regulatory su           | 2 | 0 |
| 1133 | Q3U0C0   | Cytohesin 4 OS=Mus musculus GN=Cyth               | 2 | 0 |
| 1191 | Q3U6G1   | Biliverdin reductase B (Flavin reductase (        | 2 | 0 |
| 1211 | Q3U8A6   | Putative uncharacterized protein OS=Mus           | 2 | 0 |
| 1213 | Q3U8F5   | Putative uncharacterized protein OS=Mus           | 2 | 0 |
| 1701 | Q62448   | Eukaryotic translation initiation factor 4 g      | 2 | 0 |
| 1704 | Q62523   | Zyxin OS=Mus musculus GN=Zyx PE=1                 | 2 | 0 |
| 1775 | Q6P9P6   | Kinesin-like protein KIF11 OS=Mus musc            | 2 | 0 |
| 1843 | Q7TQE2   | Zyx protein OS=Mus musculus GN=Zyx                | 2 | 0 |
| 1990 | Q8BW03   | ELAV-like protein OS=Mus musculus GN              | 2 | 0 |
| 2063 | Q8CBC8   | Branched-chain-amino-acid aminotransfer           | 2 | 0 |
| 2065 | Q8CBM0   | Putative uncharacterized protein OS=Mus           | 2 | 0 |
| 2071 | Q8CD55   | Putative uncharacterized protein OS=Mus           | 2 | 0 |

|      |          |                                              |   |    |
|------|----------|----------------------------------------------|---|----|
| 2191 | Q91XH5   | Sepiapterin reductase OS=Mus musculus        | 2 | 0  |
| 2363 | Q9D1H7   | Golgi to ER traffic protein 4 homolog OS=    | 2 | 0  |
| 2387 | Q9D8W5   | 26S proteasome non-ATPase regulatory su      | 2 | 0  |
| 2304 | Q9CWF2   | Tubulin beta-2B chain OS=Mus musculus        | 0 | 58 |
| 10   | A1L3C9   | Tumor necrosis factor receptor superfamil    | 0 | 17 |
| 450  | O89103   | Complement component C1q receptor OS         | 0 | 9  |
| 237  | E9Q4S7   | Receptor-type tyrosine-protein phosphatase   | 0 | 8  |
| 640  | P42232   | Signal transducer and activator of transcrip | 0 | 6  |
| 852  | Q08879-2 | Isoform C of Fibulin-1 OS=Mus musculus       | 0 | 6  |
| 1383 | Q3UN51   | Syntenin-2 OS=Mus musculus GN=Sdcbp          | 0 | 5  |
| 1886 | Q810B2   | Semaphorin M (Fragment) OS=Mus musc          | 0 | 5  |
| 2179 | Q91VR8   | Protein BRICK1 OS=Mus musculus GN=           | 0 | 5  |
| 2359 | Q9D176   | Sushi domain-containing protein 3 OS=M       | 0 | 5  |
| 2545 | Q9Z123   | Semaphorin-4F OS=Mus musculus GN=S           | 0 | 5  |
| 732  | P62315   | Small nuclear ribonucleoprotein Sm D1 O      | 0 | 4  |
| 801  | P83940   | Transcription elongation factor B polypep    | 0 | 4  |
| 2291 | Q9CQW9   | Interferon-induced transmembrane proteir     | 0 | 4  |
| 166  | D3YUT3   | 40S ribosomal protein S19 (Fragment) OS      | 0 | 3  |
| 184  | D3Z5R8   | 40S ribosomal protein S19 (Fragment) OS      | 0 | 3  |
| 188  | D3Z722   | 40S ribosomal protein S19 OS=Mus musc        | 0 | 3  |
| 189  | D3Z780   | Translation initiation factor eIF-2B subun   | 0 | 3  |
| 285  | F6QL70   | Protein Gm17669 OS=Mus musculus GN:          | 0 | 3  |
| 396  | O35127   | Protein C10 OS=Mus musculus GN=Grec          | 0 | 3  |
| 658  | P47915   | 60S ribosomal protein L29 OS=Mus musc        | 0 | 3  |
| 1142 | Q3U1H7   | Sorting nexin OS=Mus musculus GN=Sn:         | 0 | 3  |
| 1392 | Q3UPB9   | Sorting nexin OS=Mus musculus GN=Sn:         | 0 | 3  |
| 1586 | Q5M9P3   | Rps19 protein (Fragment) OS=Mus muscu        | 0 | 3  |
| 1656 | Q61098   | Interleukin-18 receptor 1 OS=Mus muscu       | 0 | 3  |
| 1658 | Q61166   | Microtubule-associated protein RP/EB far     | 0 | 3  |
| 1666 | Q61398   | Procollagen C-endopeptidase enhancer 1 C     | 0 | 3  |
| 1680 | Q61749   | Translation initiation factor eIF-2B subun   | 0 | 3  |
| 1708 | Q64281   | Leukocyte immunoglobulin-like receptor :     | 0 | 3  |
| 1852 | Q7TT37   | Elongator complex protein 1 OS=Mus mu        | 0 | 3  |
| 2052 | Q8C788   | Sorting nexin OS=Mus musculus GN=Sn:         | 0 | 3  |
| 2053 | Q8C845   | EF-hand domain-containing protein D2 O       | 0 | 3  |
| 2143 | Q8R3Q1   | Tissue factor OS=Mus musculus GN=F3 I        | 0 | 3  |
| 2227 | Q923G2   | DNA-directed RNA polymerases I, II, anc      | 0 | 3  |
| 2345 | Q9CZX8   | 40S ribosomal protein S19 OS=Mus musc        | 0 | 3  |
| 2368 | Q9D2R0   | Acetoacetyl-CoA synthetase OS=Mus mu         | 0 | 3  |
| 2464 | Q9JLF6   | Protein-glutamine gamma-glutamyltransfe      | 0 | 3  |

|      |        |                                              |   |   |
|------|--------|----------------------------------------------|---|---|
| 68   | A6H667 | Protein kinase C theta type OS=Mus musc      | 0 | 2 |
| 98   | B1AZI6 | THO complex subunit 2 OS=Mus muscul          | 0 | 2 |
| 193  | D6RH37 | Serine/threonine-protein kinase N1 OS=M      | 0 | 2 |
| 239  | E9Q5B5 | Hexokinase OS=Mus musculus GN=Hk2            | 0 | 2 |
| 258  | E9QAU9 | Leucine-rich repeat and calponin homolog     | 0 | 2 |
| 379  | O08528 | Hexokinase-2 OS=Mus musculus GN=Hk           | 0 | 2 |
| 784  | P70268 | Serine/threonine-protein kinase N1 OS=M      | 0 | 2 |
| 804  | P84104 | Serine/arginine-rich splicing factor 3 OS=   | 0 | 2 |
| 994  | Q3TIR2 | Putative uncharacterized protein OS=Mus      | 0 | 2 |
| 1129 | Q3TZP3 | Putative uncharacterized protein OS=Mus      | 0 | 2 |
| 1451 | Q3V3W7 | Putative uncharacterized protein OS=Mus      | 0 | 2 |
| 1662 | Q61206 | Platelet-activating factor acetylhydrolase I | 0 | 2 |
| 1910 | Q8BH61 | Coagulation factor XIII A chain OS=Mus       | 0 | 2 |
| 1987 | Q8BVU0 | Leucine-rich repeat and calponin homolog     | 0 | 2 |
| 2003 | Q8BYZ1 | ABI gene family member 3 OS=Mus mus          | 0 | 2 |
| 2004 | Q8BZP5 | Putative uncharacterized protein OS=Mus      | 0 | 2 |
| 2137 | Q8R1Q8 | Cytoplasmic dynein 1 light intermediate c    | 0 | 2 |
| 2226 | Q923F1 | Chloride channel, nucleotide-sensitive, 1A   | 0 | 2 |
| 2256 | Q99LN9 | Deoxyhypusine hydroxylase OS=Mus mu          | 0 | 2 |
| 2258 | Q99M31 | Heat shock 70 kDa protein 14 OS=Mus m        | 0 | 2 |
| 2279 | Q9CQC6 | Basic leucine zipper and W2 domain-cont      | 0 | 2 |
| 2281 | Q9CQE8 | UPF0568 protein C14orf166 homolog OS         | 0 | 2 |
| 2377 | Q9D6W4 | Putative uncharacterized protein OS=Mus      | 0 | 2 |
| 2479 | Q9QXS1 | Plectin OS=Mus musculus GN=Plec PE=          | 0 | 2 |
| 2504 | Q9R190 | Metastasis-associated protein MTA2 OS=       | 0 | 2 |
| 2549 | Q9Z1D2 | Breast cancer type 1 susceptibility protein  | 0 | 2 |

|                                                            | BP<br>3SI | BP<br>2SI |
|------------------------------------------------------------|-----------|-----------|
| <b>Biological process (BP)</b>                             |           |           |
| cellular process (GO:0009987)                              | 32.30%    | 31.80%    |
| metabolic process (GO:0008152)                             | 23.80%    | 23.50%    |
| response to stimulus (GO:0050896)                          | 9.90%     | 8.30%     |
| cellular component organization or biogenesis (GO:0071840) | 8.50%     | 9.70%     |
| immune system process (GO:0002376)                         | 5.80%     | 5.40%     |
| localization (GO:0051179)                                  | 5.40%     | 6.10%     |
| biological regulation (GO:0065007)                         | 4.90%     | 4.30%     |
| developmental process (GO:0032502)                         | 4.00%     | 4.30%     |
| biological adhesion (GO:0022610)                           | 2.20%     | 1.80%     |
| multicellular organismal process (GO:0032501)              | 1.30%     | 2.90%     |
| locomotion (GO:0040011)                                    | 1.30%     | 1.10%     |
| reproduction (GO:0000003)                                  | 0.40%     | 0.70%     |

|                                     | CC<br>3SI | CC<br>2SI |
|-------------------------------------|-----------|-----------|
| <b>Cellular component (CC)</b>      |           |           |
| cell part (GO:0044464)              | 44.90%    | 43.60%    |
| organelle (GO:0043226)              | 26.20%    | 23.60%    |
| macromolecular complex (GO:0032991) | 16.80%    | 17.90%    |
| membrane (GO:0016020)               | 7.50%     | 10.00%    |
| extracellular region (GO:0005576)   | 3.70%     | 2.90%     |

|                                        | PC<br>3SI | PC<br>2SI |
|----------------------------------------|-----------|-----------|
| <b>Protein Class (PC)</b>              |           |           |
| nucleic acid binding (PC00171)         | 14.00%    | 14.50%    |
| cytoskeletal protein (PC00085)         | 13.20%    | 11.60%    |
| enzyme modulator (PC00095)             | 13.20%    | 13.30%    |
| hydrolase (PC00121)                    | 10.10%    | 11.60%    |
| signaling molecule (PC00207)           | 9.30%     | 9.80%     |
| receptor (PC00197)                     | 5.40%     | 4.60%     |
| transporter (PC00227)                  | 4.70%     | 5.20%     |
| transferase (PC00220)                  | 4.70%     | 4.00%     |
| oxidoreductase (PC00176)               | 4.70%     | 3.50%     |
| ligase (PC00142)                       | 3.90%     | 3.50%     |
| cell adhesion molecule (PC00069)       | 3.10%     | 3.50%     |
| defense/immunity protein (PC00090)     | 3.10%     | 2.30%     |
| transcription factor (PC00218)         | 3.10%     | 3.50%     |
| transfer/carrier protein (PC00219)     | 2.30%     | 1.20%     |
| extracellular matrix protein (PC00102) | 1.60%     | 0.60%     |

|                                   |       |       |
|-----------------------------------|-------|-------|
| calcium-binding protein (PC00060) | 1.60% | 1.70% |
| chaperone (PC00072)               | 0.80% | 0.60% |
| structural protein (PC00211)      | 0.80% | 1.20% |

### Supplementary table-3 Unique Proteins Induced by IL-12

|          | Protein names                                                                                                        |
|----------|----------------------------------------------------------------------------------------------------------------------|
| Q9CWF2   | Tubulin beta-2B chain                                                                                                |
| A1L3C9   | Tumor necrosis factor receptor superfamily, member 8                                                                 |
| O89103   | Complement component C1q receptor (C1q/MBL/SPA receptor) (C1qR(p)) (C1qRp) (Cell surface antigen)                    |
| E9Q4S7   | Receptor-type tyrosine-protein phosphatase eta                                                                       |
| P42232   | Signal transducer and activator of transcription 5B                                                                  |
| Q08879-2 | Fibulin-1 (FIBL-1) (Basement-membrane protein 90) (BM-90)                                                            |
| Q3UN51   | Putative uncharacterized protein                                                                                     |
| Q810B2   | Semaphorin M (Fragment)                                                                                              |
| Q91VR8   | Protein BRICK1 (BRK1)                                                                                                |
| Q9D176   | Sushi domain-containing protein 3                                                                                    |
| Q9Z123   | Semaphorin-4F (Semaphorin-W) (Sema W)                                                                                |
| P62315   | Small nuclear ribonucleoprotein Sm D1 (Sm-D1) (Sm-D autoantigen) (snRNP core protein D1)                             |
| P83940   | Elongin-C (EloC) (Elongin 15 kDa subunit) (RNA polymerase II transcription factor SIII subunit C) (SIII)             |
| Q9CQW9   | Interferon-induced transmembrane protein 3 (Dispanin subfamily A member 2b) (DSPA2b) (Fragilis protein)              |
| D3YUT3   | 40S ribosomal protein S19 (Fragment)                                                                                 |
| D3Z5R8   | 40S ribosomal protein S19 (Fragment)                                                                                 |
| D3Z722   | 40S ribosomal protein S19                                                                                            |
| D3Z780   | Translation initiation factor eIF-2B subunit delta                                                                   |
| F6QL70   | 60S ribosomal protein L29                                                                                            |
| O35127   | Protein C10                                                                                                          |
| P47915   | 60S ribosomal protein L29                                                                                            |
| Q3U1H7   | Sorting nexin                                                                                                        |
| Q3UPB9   | Sorting nexin                                                                                                        |
| Q5M9P3   | Rps19 protein (Fragment)                                                                                             |
| Q61098   | Interleukin-18 receptor 1 (IL-18R-1) (IL-18R1) (CD218 antigen-like family member A) (IL1 receptor-related protein 1) |
| Q61166   | Microtubule-associated protein RP/EB family member 1 (APC-binding protein EB1) (End-binding protein 1)               |
| Q61398   | Procollagen C-endopeptidase enhancer 1 (P14) (Procollagen COOH-terminal proteinase enhancer 1) (PCPE1)               |
| Q61749   | Translation initiation factor eIF-2B subunit delta (eIF-2B GDP-GTP exchange factor subunit delta)                    |
| Q64281   | Leukocyte immunoglobulin-like receptor subfamily B member 4 (Mast cell surface glycoprotein Gp49B)                   |
| Q7TT37   | Elongator complex protein 1 (ELP1) (IkappaB kinase complex-associated protein) (IKK complex-associated protein)      |
| Q8C788   | Sorting nexin                                                                                                        |
| Q8C845   | EF-hand domain-containing protein D2 (Efhd2 protein) (Putative uncharacterized protein)                              |
| Q8R3Q1   | Tissue factor (TF)                                                                                                   |
| Q923G2   | DNA-directed RNA polymerases I, II, and III subunit RPABC3 (RNA polymerases I, II, and III subunit alpha)            |
| Q9CZX8   | 40S ribosomal protein S19                                                                                            |
| Q9D2R0   | Acetoacetyl-CoA synthetase (EC 6.2.1.16)                                                                             |
| Q9JLF6   | Protein-glutamine gamma-glutamyltransferase K (EC 2.3.2.13) (Epidermal TGase) (Transglutaminase K)                   |
| A6H667   | Protein kinase C theta type (EC 2.7.11.13) (nPKC-theta)                                                              |
| B1AZI6   | THO complex subunit 2 (Tho2)                                                                                         |
| D6RH37   | Serine/threonine-protein kinase N1                                                                                   |

E9Q5B5 Hexokinase-2  
 E9QAU9 Leucine-rich repeat and calponin homology domain-containing protein 3  
 O08528 Hexokinase-2 (EC 2.7.1.1) (Hexokinase type II) (HK II)  
 P70268 Serine/threonine-protein kinase N1 (EC 2.7.11.13) (Protein kinase C-like 1) (Protein kinase C-like PKN)  
 P84104 Serine/arginine-rich splicing factor 3 (Pre-mRNA-splicing factor SRP20) (Protein X16) (Splicing factor,  
 Q3TIR2 Putative uncharacterized protein  
 Q3TZP3 Putative uncharacterized protein  
 Q3V3W7 Putative uncharacterized protein  
 Q61206 Platelet-activating factor acetylhydrolase IB subunit beta (EC 3.1.1.47) (PAF acetylhydrolase 30 kDa sub  
 Q8BH61 Coagulation factor XIII A chain (Coagulation factor XIIIa) (EC 2.3.2.13) (Protein-glutamine gamma-glut  
 Q8BVU0 Leucine-rich repeat and calponin homology domain-containing protein 3  
 Q8BYZ1 ABI gene family member 3 (New molecule including SH3) (Nesh)  
 Q8BZP5 Putative uncharacterized protein  
 Q8R1Q8 Cytoplasmic dynein 1 light intermediate chain 1 (Dynein light chain A) (DLC-A) (Dynein light intermedi  
 Q923F1 Chloride channel, nucleotide-sensitive, 1A (Chloride channel, nucleotide-sensitive, 1A, isoform CRA\_b)  
 Q99LN9 Deoxyhypusine hydroxylase (DOHH) (EC 1.14.99.29) (Deoxyhypusine dioxygenase) (Deoxyhypusine m  
 Q99M31 Heat shock 70 kDa protein 14 (NST-1) (hsr.1)  
 Q9CQC6 Basic leucine zipper and W2 domain-containing protein 1  
 Q9CQE8 UPF0568 protein C14orf166 homolog  
 Q9D6W4 Putative uncharacterized protein  
 Q9QXS1 Plectin (PCN) (PLTN) (Plectin-1) (Plectin-6)  
 Q9R190 Metastasis-associated protein MTA2 (Metastasis-associated 1-like 1)  
 Q9Z1D2 Breast cancer type 1 susceptibility protein homolog (EC 2.3.2.27)



Supplementary Table-4 Molecular and Cellular Functions of IL-12-induced Unique Proteins

| <b>Functions</b>                         | <b>Genes</b> | <b>P value</b>      |
|------------------------------------------|--------------|---------------------|
| <b>Cellular Movement</b>                 | 18           | 2.88E-02 – 6.26E-05 |
| <b>Cell Morphology</b>                   | 16           | 2.84E-02 – 7.14E-05 |
| <b>Cell Death and Survival</b>           | 22           | 2.62E-02 – 4.12E-04 |
| <b>Cellular Function and Maintenance</b> | 26           | 2.84E-02 – 4.80E-04 |
| <b>Molecular Transport</b>               | 6            | 2.19E-02 – 5.22E-04 |
